# Supplementary material for: Automatic feature engineering for catalyst design using small data without prior knowledge of target catalysis
Source: PubMed Central journal article supplement (PMC10786848; doi:10.1038/s42004-023-01086-y), 2024-01-12
Supplement: 42004_2023_1086_MOESM1_ESM.pdf [file 42004_2023_1086_MOESM1_ESM.pdf]

## Supplementary Information

### **Automatic feature engineering for catalyst design using small data without prior knowledge of target catalysis**

Toshiaki Taniike<sup>1\*</sup>, Aya Fujiwara<sup>1</sup>, Sunao Nakanowatari<sup>1</sup>, Fernando García-Escobar<sup>2</sup>, and Keisuke Takahashi<sup>2</sup>

<sup>1</sup>Graduate School of Advanced Science and Technology, Japan Advanced Institute of Science and Technology, 1-1 Asahidai, Nomi, Ishikawa 923-1292, Japan

<sup>2</sup>Department of Chemistry, Hokkaido University, North 10, West 8, Sapporo 060-0810, Japan

\*Corresponding author: e-mail: [taniike@jaist.ac.jp](mailto:taniike@jaist.ac.jp)

**Table S1: Definition of features**

| Feature type              | General formula                                                                                                 |
|---------------------------|-----------------------------------------------------------------------------------------------------------------|
| Primary <sup>a</sup>      | $X_0^{i,j} = o_j(x_1^i, x_2^i, \dots, x_n^i, w_1, w_2, \dots, w_n)$                                             |
| First order <sup>b</sup>  | $X_1^{i,j,k} = f_k(X_0^{i,j})$                                                                                  |
| Second order <sup>c</sup> | $X_2^{i_1,j_1,k_1,i_2,j_2,k_2} = X_1^{i_1,j_1,k_1} \cdot X_1^{i_2,j_2,k_2}$                                     |
| Third order <sup>c</sup>  | $X_3^{i_1,j_1,k_1,i_2,j_2,k_2,i_3,j_3,k_3} = X_1^{i_1,j_1,k_1} \cdot X_1^{i_2,j_2,k_2} \cdot X_1^{i_3,j_3,k_3}$ |

<sup>a</sup> A primary feature,  $X_0^{i,j}$ , refers to a feature obtained by applying a commutative operation,  $o_j$ , to a set of values,  $x_1^i, x_2^i, \dots, x_n^i, w_1, w_2, \dots, w_n$ , where  $x_1^i$  and  $w_1$  correspond to the value of the  $i$ -th feature (e.g., electronegativity) and quantity of component 1 in a catalyst. The commutative operations employed in this study were the maximum, minimum, weighted sum, weighted average, weighted sum of squared distance, weighted average squared distance, weighted product, and weighted geometric mean; <sup>b</sup> A first-order feature,  $X_1^{i,j,k}$ , is obtained by applying a function,  $f_k$ , to a primary feature,  $X_0^{i,j}$ . Twelve types of functions ( $x$ ,  $x^{1/2}$ ,  $x^2$ ,  $x^3$ ,  $\exp(x)$ ,  $\ln(x)$ , and their reciprocals) were employed in this study; <sup>c</sup> Second- and higher-order features are the products of two or more first-order features.

**Table S2: Dataset for the oxidative coupling of methane<sup>a</sup>**

| No. | M1–M2–M3 <sup>b</sup> | Observed C <sub>2</sub> yield <sup>c</sup><br>(%) | Predicted C <sub>2</sub> yield <sup>d</sup><br>(%) |
|-----|-----------------------|---------------------------------------------------|----------------------------------------------------|
| 1   | Li–Mg–Zr              | 18.6                                              | 17.5                                               |
| 2   | Li–Co–Zn              | 6.2                                               | 9.4                                                |
| 3   | Li–Co–Nd              | 7.1                                               | 7.1                                                |
| 4   | Li–Co–Eu              | 13.8                                              | 7.4                                                |
| 5   | Li–Zr–Cs              | 16.4                                              | 16.3                                               |
| 6   | Na–Ca–Mn              | 9.0                                               | 8.8                                                |
| 7   | Na–Fe–Ce              | 9.3                                               | 12.1                                               |
| 8   | Mg–K–Y                | 17.0                                              | 17.0                                               |
| 9   | Mg–V–Mn               | 10.2                                              | 11.0                                               |
| 10  | Mg–Mn–Ni              | 8.7                                               | 6.6                                                |
| 11  | Mg–Pd                 | 0.8                                               | 1.1                                                |
| 12  | Mg–Ni–W               | 9.6                                               | 5.9                                                |
| 13  | K–Ca–Zr               | 13.7                                              | 15.6                                               |
| 14  | K–V–Mo                | 18.5                                              | 17.7                                               |
| 15  | K–Zr–La               | 17.5                                              | 15.9                                               |
| 16  | Ca–Mn–Mo              | 10.3                                              | 10.4                                               |
| 17  | Ca–Y–Zr               | 11.0                                              | 11.0                                               |
| 18  | Ca–W                  | 6.2                                               | 14.7                                               |
| 19  | V–Mn–Cu               | 10.0                                              | 9.1                                                |
| 20  | V–Fe                  | 13.9                                              | 17.8                                               |
| 21  | V–Zr–Eu               | 12.9                                              | 14.2                                               |
| 22  | Mn–Y–Hf               | 6.1                                               | 9.4                                                |
| 23  | Fe–Ba–La              | 14.1                                              | 14.1                                               |
| 24  | Co–Zn–Zr              | 12.4                                              | 12.4                                               |
| 25  | Zn–Hf                 | 16.9                                              | 17.6                                               |
| 26  | Sr–Mo                 | 21.2                                              | 18.7                                               |
| 27  | Sr–Ba–Hf              | 10.6                                              | 13.6                                               |
| 28  | Mo–Cs–W               | 20.2                                              | 19.2                                               |
| 29  | Ce–Nd–Hf              | 15.2                                              | 15.2                                               |
| 30  | Fe–Fe–W               | 16.5                                              | 16.6                                               |
| 31  | Mg–Mo–Hf              | 18.7                                              | 16.6                                               |
| 32  | K–Mo–La               | 3.3                                               | 17.5                                               |
| 33  | Fe–Ce                 | 15.8                                              | 15.1                                               |

| No. | M1–M2–M3 <sup>b</sup> | Observed C <sub>2</sub> yield <sup>c</sup><br>(%) | Predicted C <sub>2</sub> yield <sup>d</sup><br>(%) |
|-----|-----------------------|---------------------------------------------------|----------------------------------------------------|
| 34  | Li–Zr–Mo              | 13.8                                              | 18.1                                               |
| 35  | Na–Sr–Mo              | 17.4                                              | 17.6                                               |
| 36  | Li–Mo–La              | 18.0                                              | 17.5                                               |
| 37  | Li–Mo–Nd              | 15.9                                              | 17.5                                               |
| 38  | Li–Mo–Ba              | 20.2                                              | 17.2                                               |
| 39  | Li–Ba–Nd              | 17.2                                              | 17.2                                               |
| 40  | Li–Nd–Tb              | 17.5                                              | 16.3                                               |
| 41  | Li–Y–Eu               | 15.3                                              | 16.7                                               |
| 42  | K–Ti–W                | 16.5                                              | 16.4                                               |
| 43  | Ti–Cs–W               | 17.5                                              | 16.1                                               |
| 44  | Ti–Tb–W               | 17.1                                              | 16.2                                               |
| 45  | Sr–Hf                 | 15.0                                              | 13.8                                               |
| 46  | V–Sr                  | 11.8                                              | 14.0                                               |
| 47  | Sr–Mo–Hf              | 13.3                                              | 16.6                                               |
| 48  | Sr–Mo–W               | 13.5                                              | 17.5                                               |
| 49  | Sr–Mo–Ba              | 16.8                                              | 16.7                                               |
| 50  | Li–Mo–Cs              | 17.4                                              | 18.1                                               |
| 51  | Li–Mo–W               | 16.3                                              | 18.5                                               |
| 52  | V–Mo–W                | 14.3                                              | 17.2                                               |
| 53  | K–Mo–W                | 18.4                                              | 18.4                                               |
| 54  | Zr–Mo–Cs              | 18.0                                              | 18.8                                               |
| 55  | Zr–Cs–W               | 17.3                                              | 16.2                                               |
| 56  | K–V–W                 | 15.0                                              | 15.4                                               |
| 57  | K–Y–Mo                | 17.6                                              | 18.1                                               |
| 58  | K–V–Y                 | 18.2                                              | 14.7                                               |
| 59  | Mg–Zr–Eu              | 18.8                                              | 18.2                                               |
| 60  | K–V–Eu                | 20.4                                              | 14.1                                               |
| 61  | V–Mo–Eu               | 17.0                                              | 16.7                                               |
| 62  | K–Ca–Mo               | 18.2                                              | 17.3                                               |
| 63  | K–V–Zr                | 14.8                                              | 14.9                                               |
| 64  | Mg–Zr–Cs              | 15.2                                              | 16.9                                               |
| 65  | Mg–Y–Zr               | 18.6                                              | 18.5                                               |
| 66  | Li–Ti–W               | 19.0                                              | 16.8                                               |
| 67  | Mg–Ca–Sr              | 17.4                                              | 17.0                                               |

| No. | M1–M2–M3 <sup>b</sup> | Observed C <sub>2</sub> yield <sup>c</sup><br>(%) | Predicted C <sub>2</sub> yield <sup>d</sup><br>(%) |
|-----|-----------------------|---------------------------------------------------|----------------------------------------------------|
| 68  | Mg–K–Ba               | 12.8                                              | 15.6                                               |
| 69  | Eu–Hf–W               | 16.9                                              | 16.9                                               |
| 70  | Fe–Mo–Hf              | 16.0                                              | 15.4                                               |
| 71  | Cu–Cu–La              | 2.4                                               | 8.0                                                |
| 72  | Li–Zn–Tb              | 14.8                                              | 14.5                                               |
| 73  | Li–K–Fe               | 12.5                                              | 12.2                                               |
| 74  | V–Co–Cs               | 10.3                                              | 10.3                                               |
| 75  | Ti–Mo–Cs              | 17.7                                              | 18.5                                               |
| 76  | Na–Ni–W               | 0.0                                               | 4.1                                                |
| 77  | Eu–Eu–W               | 16.2                                              | 16.9                                               |
| 78  | Ti–Cs–Cs              | 19.6                                              | 19.6                                               |
| 79  | Mg–Pd–Ce              | 0.0                                               | -0.1                                               |
| 80  | Li–Mg–Cs              | 17.6                                              | 16.7                                               |
| 81  | Na–Mo–Cs              | 18.5                                              | 18.8                                               |
| 82  | K–V–Ba                | 14.7                                              | 13.6                                               |
| 83  | K–Mo–Mo               | 20.6                                              | 20.2                                               |
| 84  | Sr–Zr–La              | 22.2                                              | 10.8                                               |
| 85  | Ca–Pd–Nd              | 0.0                                               | 0.0                                                |
| 86  | Cu–Cs–Nd              | 7.3                                               | 7.4                                                |
| 87  | Li–Ce–Nd              | 11.9                                              | 17.6                                               |
| 88  | Cs–Eu                 | 17.8                                              | 18.3                                               |
| 89  | Eu–W                  | 16.9                                              | 17.4                                               |
| 90  | K–Ti–Cu               | 7.7                                               | 7.7                                                |
| 91  | Li–Zn–Zn              | 17.7                                              | 16.0                                               |
| 92  | Zr–Mo–Eu              | 17.6                                              | 17.7                                               |
| 93  | K–La–W                | 18.4                                              | 15.7                                               |
| 94  | Cs–Eu–W               | 17.6                                              | 16.8                                               |
| 95  | Ce–Hf–W               | 17.7                                              | 16.3                                               |

<sup>a</sup> The data were curated from previous studies<sup>1–4</sup>; <sup>b</sup> Catalysts are generally denoted as M1–M2–M3/BaO, where M1–M3 are co-supported on BaO at a loading of 0.371 mmol per gram support; <sup>c</sup> Maximum C<sub>2</sub> yield observed among the 135 reaction conditions; <sup>d</sup> Obtained using a Huber regressor with eight selected first-order features.

**Table S3: Dataset for the conversion of ethanol to butadiene<sup>a</sup>**

| No. | Composition <sup>b</sup> (mmol g-support <sup>-1</sup> ) |        |        |        |        |        |        |        |        |        |        |        |        |        | Observed<br>C <sub>4</sub> H <sub>6</sub> yield <sup>c</sup><br>(%) | Predicted<br>C <sub>4</sub> H <sub>6</sub><br>yield <sup>d</sup> (%) |
|-----|----------------------------------------------------------|--------|--------|--------|--------|--------|--------|--------|--------|--------|--------|--------|--------|--------|---------------------------------------------------------------------|----------------------------------------------------------------------|
|     | Mg                                                       | Zn     | Cu     | Ag     | Ni     | Al     | La     | Y      | Hf     | Zr     | Cr     | Ga     | Nb     | Mo     |                                                                     |                                                                      |
| 1   | 0                                                        | 0.1107 | 0.1599 | 0.0369 | 0.3075 | 0.0123 | 0.0246 | 0.0492 | 0.0123 | 0.1353 | 0.1353 | 0.0984 | 0.1353 | 0.0123 | 30                                                                  | 27                                                                   |
| 2   | 0.0099                                                   | 0      | 0.1188 | 0.099  | 0.0396 | 0      | 0.1188 | 0.0693 | 0.1683 | 0.0099 | 0.198  | 0.1089 | 0.0198 | 0.0297 | 26                                                                  | 19                                                                   |
| 3   | 0                                                        | 0.054  | 0.0702 | 0      | 0.0432 | 0.0054 | 0.0216 | 0.0378 | 0.0054 | 0.1782 | 0.0648 | 0.0108 | 0.0378 | 0.0108 | 32                                                                  | 31                                                                   |
| 4   | 0.1323                                                   | 0.2205 | 0.0882 | 0.3822 | 0.1323 | 0.0294 | 0.0294 | 0.0441 | 0      | 0.1029 | 0.0441 | 0.0441 | 0.147  | 0.0735 | 34                                                                  | 34                                                                   |
| 5   | 0.042                                                    | 0.1008 | 0.1008 | 0.0336 | 0.1008 | 0      | 0.0168 | 0.0084 | 0      | 0.1176 | 0.1092 | 0.0672 | 0.1428 | 0      | 28                                                                  | 32                                                                   |
| 6   | 0.1281                                                   | 0.0732 | 0.6039 | 0.2379 | 0.1098 | 0.1098 | 0.2013 | 0      | 0      | 0.0366 | 0.1281 | 0.1281 | 0.0366 | 0.0366 | 12                                                                  | 11                                                                   |
| 7   | 0.0204                                                   | 0.0153 | 0.0816 | 0.0153 | 0.0255 | 0.0051 | 0      | 0.051  | 0.0153 | 0.051  | 0.0714 | 0.0561 | 0.102  | 0      | 12                                                                  | 10                                                                   |
| 8   | 0.0369                                                   | 0.0615 | 0.1476 | 0.3075 | 0.0615 | 0.0738 | 0.0123 | 0.2583 | 0.0123 | 0.0246 | 0.0492 | 0.0492 | 0      | 0.1353 | 13                                                                  | 21                                                                   |
| 9   | 0.1128                                                   | 0.0987 | 0.0705 | 0.0141 | 0.282  | 0      | 0.0987 | 0.0987 | 0.0846 | 0.1974 | 0.0705 | 0.141  | 0.0846 | 0.0564 | 33                                                                  | 33                                                                   |
| 10  | 0                                                        | 0      | 0.2844 | 0.4503 | 0.2133 | 0.0237 | 0.6636 | 0.1659 | 0.1896 | 0      | 0.1896 | 0.1185 | 0      | 0.0711 | 21                                                                  | 29                                                                   |
| 11  | 0                                                        | 0.1215 | 0.018  | 0      | 0.0045 | 0.054  | 0.0405 | 0      | 0.027  | 0.0045 | 0.054  | 0.018  | 0.036  | 0.072  | 20                                                                  | 20                                                                   |
| 12  | 0.2016                                                   | 0.0288 | 0.0384 | 0.1824 | 0.1152 | 0.0288 | 0.0864 | 0.1728 | 0.0288 | 0.0096 | 0      | 0      | 0.0672 | 0      | 25                                                                  | 24                                                                   |
| 13  | 0.0621                                                   | 0.0828 | 0.3105 | 0.4347 | 0.0828 | 0.0207 | 0.0621 | 0.207  | 0.0414 | 0.3519 | 0      | 0.2691 | 0.1449 | 0      | 28                                                                  | 27                                                                   |
| 14  | 0                                                        | 0      | 0.066  | 0      | 0.0528 | 0.132  | 0.1716 | 0      | 0.2376 | 0.0396 | 0.0528 | 0.198  | 0.1584 | 0.2112 | 15                                                                  | 14                                                                   |
| 15  | 0.0318                                                   | 0.0954 | 0.0954 | 0.1431 | 0.0795 | 0.0477 | 0.0159 | 0.3498 | 0.0636 | 0.0795 | 0.0159 | 0.0318 | 0.2703 | 0.2703 | 21                                                                  | 26                                                                   |
| 16  | 0.432                                                    | 0.024  | 0.024  | 0.048  | 0.096  | 0.024  | 0.192  | 0.144  | 0.6    | 0.072  | 0.264  | 0.288  | 0      | 0.192  | 23                                                                  | 23                                                                   |
| 17  | 0.0336                                                   | 0.0252 | 0.3024 | 0.0924 | 0.0168 | 0.084  | 0      | 0.1176 | 0      | 0.0336 | 0.0588 | 0      | 0      | 0.0756 | 8                                                                   | 8                                                                    |
| 18  | 0.099                                                    | 0.0792 | 0.1386 | 0.0396 | 0.1584 | 0.4752 | 0.0198 | 0.1188 | 0.1782 | 0.3564 | 0.0792 | 0.0792 | 0.0198 | 0.1386 | 28                                                                  | 19                                                                   |
| 19  | 0.0111                                                   | 0.0777 | 0.111  | 0.0777 | 0.0888 | 0.0444 | 0.0777 | 0.0444 | 0.1665 | 0.0777 | 0.0333 | 0.1332 | 0.0555 | 0.0999 | 33                                                                  | 30                                                                   |

| No. | Composition <sup>b</sup> (mmol g-support <sup>-1</sup> ) |        |        |        |        |        |        |        |        |        |        |        |        |        | Observed<br>C <sub>4</sub> H <sub>6</sub> yield <sup>c</sup><br>(%) | Predicted<br>C <sub>4</sub> H <sub>6</sub><br>yield <sup>d</sup> (%) |
|-----|----------------------------------------------------------|--------|--------|--------|--------|--------|--------|--------|--------|--------|--------|--------|--------|--------|---------------------------------------------------------------------|----------------------------------------------------------------------|
|     | Mg                                                       | Zn     | Cu     | Ag     | Ni     | Al     | La     | Y      | Hf     | Zr     | Cr     | Ga     | Nb     | Mo     |                                                                     |                                                                      |
| 20  | 0.0141                                                   | 0.0141 | 0.0141 | 0.0846 | 0.0564 | 0.1692 | 0.1692 | 0.1692 | 0.0705 | 0.1551 | 0.0564 | 0.1269 | 0.1692 | 0.1269 | 14                                                                  | 16                                                                   |
| 21  | 0.0615                                                   | 0.1476 | 0.1476 | 0.0492 | 0.1476 | 0.0123 | 0.0246 | 0.0123 | 0.0123 | 0.1353 | 0.1353 | 0.0984 | 0.2091 | 0.0369 | 30                                                                  | 31                                                                   |
| 22  | 0.1035                                                   | 0.0828 | 0      | 0.0414 | 0.0828 | 0.4968 | 0.0207 | 0.207  | 0.0414 | 0.3519 | 0.0828 | 0.2691 | 0.1449 | 0.1449 | 15                                                                  | 15                                                                   |
| 23  | 0.0528                                                   | 0.0396 | 0.2904 | 0.1452 | 0.0264 | 0.132  | 0      | 0.1848 | 0.2376 | 0.0396 | 0.0528 | 0      | 0      | 0.1188 | 20                                                                  | 20                                                                   |
| 24  | 0.0099                                                   | 0.0099 | 0.198  | 0.0396 | 0.0396 | 0      | 0.1188 | 0.099  | 0.0891 | 0.0099 | 0.198  | 0.0198 | 0.0198 | 0.1386 | 12                                                                  | 16                                                                   |
| 25  | 0                                                        | 0.0924 | 0.066  | 0.0132 | 0.0528 | 0.132  | 0.1716 | 0.0924 | 0.0792 | 0.1848 | 0.066  | 0.198  | 0.0792 | 0.0924 | 27                                                                  | 26                                                                   |
| 26  | 0.0318                                                   | 0.0954 | 0.0954 | 0.4134 | 0.0795 | 0.0477 | 0.0159 | 0.0795 | 0.0636 | 0.0795 | 0.0159 | 0.0318 | 0.2703 | 0.2703 | 23                                                                  | 23                                                                   |
| 27  | 0                                                        | 0      | 0.1008 | 0.0336 | 0.42   | 0.0084 | 0.0168 | 0.0588 | 0.0672 | 0      | 0.0672 | 0.042  | 0      | 0.0252 | 10                                                                  | 10                                                                   |
| 28  | 0                                                        | 0.1107 | 0.246  | 0.0492 | 0      | 0.0123 | 0.123  | 0.123  | 0.0123 | 0.2214 | 0      | 0.0246 | 0.1353 | 0.1722 | 36                                                                  | 36                                                                   |
| 29  | 0                                                        | 0.054  | 0.108  | 0      | 0.0432 | 0      | 0.054  | 0.054  | 0.0054 | 0.1296 | 0.0648 | 0.0108 | 0.0054 | 0.0108 | 29                                                                  | 30                                                                   |
| 30  | 0                                                        | 0.054  | 0.0702 | 0      | 0.0432 | 0.0054 | 0.0216 | 0.0378 | 0.0054 | 0.1782 | 0.0648 | 0.0108 | 0.0378 | 0.0108 | 32                                                                  | 31                                                                   |
| 31  | 0.0432                                                   | 0.054  | 0.0702 | 0.0054 | 0      | 0.0054 | 0.0162 | 0.0378 | 0.0054 | 0.1782 | 0.0648 | 0.0108 | 0.0378 | 0.0108 | 34                                                                  | 34                                                                   |
| 32  | 0.1323                                                   | 0.0735 | 0.0882 | 0.3822 | 0.1323 | 0.0294 | 0.0294 | 0      | 0.0882 | 0.2058 | 0.0441 | 0.0441 | 0.147  | 0.0735 | 28                                                                  | 31                                                                   |
| 33  | 0.021                                                    | 0.0945 | 0.1365 | 0.0315 | 0.2625 | 0.0105 | 0      | 0.042  | 0.0105 | 0.1155 | 0.1155 | 0.084  | 0.1155 | 0.0105 | 27                                                                  | 25                                                                   |
| 34  | 0                                                        | 0.0102 | 0.1326 | 0.0306 | 0.255  | 0.0918 | 0.0204 | 0.0408 | 0.0102 | 0.1122 | 0.1122 | 0.0816 | 0.1122 | 0.0102 | 10                                                                  | 11                                                                   |
| 35  | 0.1272                                                   | 0.0159 | 0.0954 | 0.1908 | 0      | 0.0477 | 0.0795 | 0.0477 | 0.2544 | 0.2862 | 0.2385 | 0      | 0.2067 | 0      | 26                                                                  | 23                                                                   |
| 36  | 0.0561                                                   | 0.0612 | 0.0051 | 0.051  | 0.0714 | 0.0612 | 0.0153 | 0.0153 | 0      | 0.0102 | 0.0663 | 0      | 0.0714 | 0.0255 | 13                                                                  | 16                                                                   |
| 37  | 0                                                        | 0.054  | 0.0702 | 0      | 0.0432 | 0.0054 | 0.0216 | 0.0378 | 0.0054 | 0.1782 | 0.0648 | 0.0108 | 0.0378 | 0.0108 | 32                                                                  | 31                                                                   |
| 38  | 0.1323                                                   | 0.2205 | 0.0882 | 0.3822 | 0.1323 | 0.0294 | 0.0294 | 0.0441 | 0      | 0.1029 | 0.0441 | 0.0441 | 0.147  | 0.0735 | 31                                                                  | 34                                                                   |
| 39  | 0.0486                                                   | 0.054  | 0.0702 | 0.1188 | 0.0432 | 0      | 0      | 0.0378 | 0      | 0.0378 | 0.0648 | 0      | 0.0378 | 0.027  | 18                                                                  | 25                                                                   |

| No. | Composition <sup>b</sup> (mmol g-support <sup>-1</sup> ) |        |        |        |        |        |        |        |        |        |        |        |        |        | Observed<br>C <sub>4</sub> H <sub>6</sub> yield <sup>c</sup><br>(%) | Predicted<br>C <sub>4</sub> H <sub>6</sub><br>yield <sup>d</sup> (%) |
|-----|----------------------------------------------------------|--------|--------|--------|--------|--------|--------|--------|--------|--------|--------|--------|--------|--------|---------------------------------------------------------------------|----------------------------------------------------------------------|
|     | Mg                                                       | Zn     | Cu     | Ag     | Ni     | Al     | La     | Y      | Hf     | Zr     | Cr     | Ga     | Nb     | Mo     |                                                                     |                                                                      |
| 40  | 0                                                        | 0.054  | 0.0702 | 0      | 0.0432 | 0.0054 | 0.0216 | 0.0378 | 0.0054 | 0.1782 | 0.0648 | 0.0108 | 0.0378 | 0.0108 | 30                                                                  | 31                                                                   |
| 41  | 0.0105                                                   | 0.0735 | 0.1365 | 0.0315 | 0.084  | 0.042  | 0.0735 | 0.042  | 0.252  | 0.0735 | 0.0315 | 0.126  | 0.0525 | 0.0105 | 39                                                                  | 37                                                                   |
| 42  | 0.084                                                    | 0.0945 | 0.0525 | 0.0105 | 0.21   | 0.0105 | 0.0735 | 0.0735 | 0.063  | 0.1155 | 0.0525 | 0.105  | 0.063  | 0.042  | 34                                                                  | 33                                                                   |
| 43  | 0.1323                                                   | 0.2205 | 0.0882 | 0.3822 | 0.1323 | 0.0147 | 0.0294 | 0.0441 | 0      | 0.1029 | 0.1029 | 0.0441 | 0.1029 | 0.0735 | 38                                                                  | 34                                                                   |
| 44  | 0.1323                                                   | 0.2205 | 0.0735 | 0      | 0      | 0.0294 | 0.1911 | 0.1029 | 0      | 0.2058 | 0.0441 | 0.2205 | 0.147  | 0.1029 | 45                                                                  | 36                                                                   |
| 45  | 0                                                        | 0.054  | 0.0702 | 0      | 0.0432 | 0.0054 | 0.0216 | 0.0378 | 0.0054 | 0.1782 | 0.0648 | 0.0108 | 0.0378 | 0.0108 | 38                                                                  | 31                                                                   |
| 46  | 0.1323                                                   | 0.0735 | 0.147  | 0.3822 | 0.1323 | 0.0294 | 0.0294 | 0      | 0.0882 | 0.2058 | 0.0441 | 0.0588 | 0.0735 | 0.0735 | 32                                                                  | 30                                                                   |
| 47  | 0                                                        | 0.054  | 0.0702 | 0.0162 | 0.0432 | 0.0054 | 0.0216 | 0.054  | 0.0054 | 0.1782 | 0.0648 | 0.0108 | 0.0054 | 0.0108 | 34                                                                  | 32                                                                   |
| 48  | 0                                                        | 0.0861 | 0.0615 | 0.0123 | 0.246  | 0.0123 | 0.0246 | 0.0861 | 0.0738 | 0.1722 | 0.2337 | 0.0984 | 0.0738 | 0.0492 | 39                                                                  | 29                                                                   |
| 49  | 0                                                        | 0.1107 | 0.246  | 0.0492 | 0.0123 | 0.0123 | 0.123  | 0.123  | 0      | 0.2214 | 0      | 0.0246 | 0.1353 | 0.1722 | 43                                                                  | 31                                                                   |
| 50  | 0.0123                                                   | 0.1107 | 0.246  | 0.0492 | 0      | 0      | 0.123  | 0.123  | 0.0123 | 0.2214 | 0      | 0.0246 | 0.1353 | 0.1722 | 37                                                                  | 37                                                                   |
| 51  | 0.0357                                                   | 0.0408 | 0.0408 | 0.0612 | 0.0408 | 0.0204 | 0.0612 | 0.0306 | 0.0102 | 0.0612 | 0.0459 | 0.0051 | 0.0561 | 0.0051 | 13                                                                  | 22                                                                   |
| 52  | 0.0384                                                   | 0.1344 | 0.2112 | 0.1344 | 0.1536 | 0.288  | 0.2112 | 0.096  | 0.1536 | 0.2688 | 0      | 0.1344 | 0.0384 | 0.0768 | 27                                                                  | 28                                                                   |
| 53  | 0.1323                                                   | 0.2205 | 0.0735 | 0      | 0.1764 | 0.0294 | 0.1911 | 0.1029 | 0      | 0.2058 | 0.0441 | 0.0441 | 0.147  | 0.1029 | 37                                                                  | 36                                                                   |
| 54  | 0.1323                                                   | 0.2205 | 0.0882 | 0.3822 | 0.1323 | 0.0147 | 0.0294 | 0.0441 | 0      | 0.1029 | 0.1029 | 0.0441 | 0.1029 | 0.0735 | 36                                                                  | 34                                                                   |
| 55  | 0                                                        | 0.1107 | 0.246  | 0.0492 | 0.0123 | 0.0615 | 0.123  | 0.123  | 0      | 0.1722 | 0      | 0.0246 | 0.1353 | 0.1722 | 29                                                                  | 28                                                                   |
| 56  | 0.0162                                                   | 0.054  | 0.0702 | 0.0162 | 0.0432 | 0.0054 | 0.0216 | 0.0378 | 0.0054 | 0.1782 | 0.0648 | 0.0108 | 0.0054 | 0.0108 | 33                                                                  | 32                                                                   |
| 57  | 0.1323                                                   | 0.2205 | 0.0735 | 0      | 0      | 0.0294 | 0.1911 | 0.1029 | 0      | 0.2058 | 0.0441 | 0.0294 | 0.147  | 0.294  | 36                                                                  | 34                                                                   |
| 58  | 0.0105                                                   | 0.0735 | 0.0735 | 0.042  | 0.084  | 0.042  | 0.0735 | 0.105  | 0.252  | 0.0735 | 0.0315 | 0.126  | 0.0525 | 0.0105 | 39                                                                  | 38                                                                   |
| 59  | 0.1323                                                   | 0.2205 | 0.0735 | 0      | 0      | 0.0294 | 0.1911 | 0.1029 | 0      | 0.2058 | 0.0441 | 0.2205 | 0.147  | 0.1029 | 36                                                                  | 36                                                                   |



| No. | Composition <sup>b</sup> (mmol g-support <sup>-1</sup> ) |        |        |        |        |        |        |        |        |        |        |        |        |        | Observed<br>C <sub>4</sub> H <sub>6</sub> yield <sup>c</sup><br>(%) | Predicted<br>C <sub>4</sub> H <sub>6</sub><br>yield <sup>d</sup> (%) |
|-----|----------------------------------------------------------|--------|--------|--------|--------|--------|--------|--------|--------|--------|--------|--------|--------|--------|---------------------------------------------------------------------|----------------------------------------------------------------------|
|     | Mg                                                       | Zn     | Cu     | Ag     | Ni     | Al     | La     | Y      | Hf     | Zr     | Cr     | Ga     | Nb     | Mo     |                                                                     |                                                                      |
| 60  | 0.1323                                                   | 0      | 0.1911 | 0.3822 | 0.1176 | 0.0294 | 0.0294 | 0.1029 | 0.0294 | 0.2058 | 0.0441 | 0.0294 | 0.1029 | 0.0735 | 15                                                                  | 17                                                                   |
| 61  | 0.1323                                                   | 0.2205 | 0.0882 | 0.0588 | 0.1764 | 0.0147 | 0.147  | 0.147  | 0      | 0.1029 | 0      | 0.0294 | 0.147  | 0.2058 | 32                                                                  | 33                                                                   |
| 62  | 0                                                        | 0.0612 | 0.0765 | 0.0204 | 0      | 0      | 0.051  | 0.051  | 0.0051 | 0.0918 | 0.0663 | 0.0102 | 0.0561 | 0.0255 | 36                                                                  | 30                                                                   |
| 63  | 0                                                        | 0.0861 | 0.123  | 0.0861 | 0      | 0.0492 | 0.0738 | 0.0492 | 0.1845 | 0.0861 | 0.0369 | 0.1476 | 0.1353 | 0.1722 | 27                                                                  | 31                                                                   |
| 64  | 0                                                        | 0.1107 | 0.246  | 0.0492 | 0.0123 | 0.0123 | 0.123  | 0.123  | 0      | 0.2214 | 0      | 0.0246 | 0.1353 | 0.1722 | 32                                                                  | 31                                                                   |
| 65  | 0.1323                                                   | 0.2205 | 0.0735 | 0.0441 | 0      | 0.0294 | 0.1911 | 0.1029 | 0      | 0.2058 | 0      | 0.2205 | 0.147  | 0.1029 | 36                                                                  | 37                                                                   |
| 66  | 0.1323                                                   | 0.2205 | 0.0735 | 0      | 0.1029 | 0.0294 | 0.1911 | 0.1029 | 0      | 0.2058 | 0.0441 | 0.2205 | 0.147  | 0      | 38                                                                  | 36                                                                   |
| 67  | 0.0336                                                   | 0.0624 | 0.0336 | 0.0096 | 0.0288 | 0.048  | 0.0432 | 0.0624 | 0.0576 | 0.0048 | 0.0288 | 0.0096 | 0.0432 | 0.0096 | 28                                                                  | 26                                                                   |
| 68  | 0.126                                                    | 0.063  | 0.054  | 0.063  | 0.126  | 0.081  | 0.036  | 0.027  | 0.009  | 0.081  | 0.036  | 0.081  | 0.081  | 0.027  | 22                                                                  | 22                                                                   |
| 69  | 0                                                        | 0.1107 | 0.246  | 0.0492 | 0.0123 | 0.0123 | 0.123  | 0.123  | 0      | 0.2214 | 0      | 0.0246 | 0.1353 | 0.1722 | 33                                                                  | 31                                                                   |
| 70  | 0.1107                                                   | 0.1845 | 0.0615 | 0.0492 | 0.1476 | 0.0123 | 0.123  | 0.0861 | 0      | 0.1722 | 0.0369 | 0.0246 | 0.1353 | 0.0861 | 40                                                                  | 35                                                                   |
| 71  | 0.0123                                                   | 0.0615 | 0.0861 | 0.0861 | 0.0984 | 0.0492 | 0.0738 | 0.0492 | 0.2952 | 0.0861 | 0.0369 | 0.1476 | 0.1353 | 0.0123 | 34                                                                  | 34                                                                   |
| 72  | 0.0123                                                   | 0.0861 | 0.246  | 0.0492 | 0      | 0.0123 | 0.123  | 0.123  | 0.0615 | 0.2214 | 0.0369 | 0.0246 | 0.0615 | 0.1722 | 34                                                                  | 35                                                                   |
| 73  | 0.0441                                                   | 0.2205 | 0.0735 | 0.0735 | 0.1176 | 0.0294 | 0.0588 | 0.1029 | 0.0147 | 0.4851 | 0.1764 | 0.0294 | 0.0147 | 0.0294 | 42                                                                  | 43                                                                   |
| 74  | 0                                                        | 0.1575 | 0.0735 | 0.042  | 0      | 0.042  | 0.1365 | 0.105  | 0.0105 | 0.147  | 0.0315 | 0.126  | 0.105  | 0.0735 | 36                                                                  | 35                                                                   |
| 75  | 0.1323                                                   | 0.147  | 0.0882 | 0.3822 | 0.1323 | 0      | 0.0294 | 0.147  | 0      | 0.1029 | 0.1029 | 0.0294 | 0.1029 | 0.0735 | 32                                                                  | 32                                                                   |
| 76  | 0                                                        | 0.1845 | 0.0615 | 0.0369 | 0.0246 | 0.0246 | 0.1599 | 0      | 0.0738 | 0.1722 | 0.2337 | 0.0984 | 0.0738 | 0.0861 | 32                                                                  | 32                                                                   |
| 77  | 0.0105                                                   | 0.0735 | 0.0735 | 0.042  | 0.084  | 0.042  | 0.0735 | 0.042  | 0.252  | 0.0735 | 0.0315 | 0.189  | 0.0525 | 0.0105 | 36                                                                  | 36                                                                   |
| 78  | 0.1323                                                   | 0.2205 | 0.0735 | 0.0588 | 0      | 0.0294 | 0.1911 | 0.1029 | 0.0588 | 0.2058 | 0.0441 | 0.1764 | 0.0735 | 0.1029 | 39                                                                  | 39                                                                   |
| 79  | 0.0162                                                   | 0.054  | 0.0702 | 0.0162 | 0.0432 | 0.0054 | 0.0216 | 0.0378 | 0      | 0.1782 | 0.0648 | 0.0108 | 0.0054 | 0.0162 | 32                                                                  | 31                                                                   |

| No. | Composition <sup>b</sup> (mmol g-support <sup>-1</sup> ) |        |        |        |        |        |        |        |        |        |        |        |        |        | Observed<br>C <sub>4</sub> H <sub>6</sub> yield <sup>c</sup><br>(%) | Predicted<br>C <sub>4</sub> H <sub>6</sub><br>yield <sup>d</sup> (%) |
|-----|----------------------------------------------------------|--------|--------|--------|--------|--------|--------|--------|--------|--------|--------|--------|--------|--------|---------------------------------------------------------------------|----------------------------------------------------------------------|
|     | Mg                                                       | Zn     | Cu     | Ag     | Ni     | Al     | La     | Y      | Hf     | Zr     | Cr     | Ga     | Nb     | Mo     |                                                                     |                                                                      |
| 80  | 0                                                        | 0.0735 | 0.0735 | 0.042  | 0.084  | 0.042  | 0.0735 | 0.105  | 0.252  | 0.189  | 0.0315 | 0.021  | 0.0525 | 0.0105 | 40                                                                  | 41                                                                   |
| 81  | 0.1323                                                   | 0.2205 | 0.0735 | 0      | 0      | 0.0294 | 0.1911 | 0.1029 | 0      | 0.0441 | 0.2058 | 0.2205 | 0.147  | 0.1029 | 22                                                                  | 31                                                                   |
| 82  | 0.1323                                                   | 0.2205 | 0.0735 | 0      | 0      | 0.0294 | 0.1911 | 0.1029 | 0      | 0.2058 | 0.0441 | 0.2205 | 0.147  | 0.1029 | 34                                                                  | 36                                                                   |
| 83  | 0.132                                                    | 0.264  | 0.2112 | 0.3168 | 0.1584 | 0.264  | 0.1584 | 0.1584 | 0.0528 | 0.132  | 0.2112 | 0.2376 | 0.2376 | 0.132  | 23                                                                  | 18                                                                   |
| 84  | 0.0546                                                   | 0.0078 | 0.0468 | 0.0195 | 0.0195 | 0.0117 | 0.0507 | 0.0195 | 0.039  | 0.039  | 0.0312 | 0.0039 | 0.039  | 0.0117 | 12                                                                  | 15                                                                   |
| 85  | 0.0945                                                   | 0.0735 | 0.0945 | 0      | 0.084  | 0.042  | 0.1365 | 0.0735 | 0      | 0.147  | 0.0315 | 0.1575 | 0.105  | 0.0105 | 30                                                                  | 27                                                                   |
| 86  | 0.0105                                                   | 0.0735 | 0.0735 | 0.042  | 0.084  | 0.042  | 0.0735 | 0.105  | 0.252  | 0.0735 | 0.0315 | 0.126  | 0.0525 | 0.0105 | 34                                                                  | 38                                                                   |
| 87  | 0                                                        | 0.1107 | 0.0861 | 0.0861 | 0.0123 | 0.0492 | 0.0738 | 0.0492 | 0      | 0.0861 | 0      | 0.5289 | 0.1353 | 0.0123 | 18                                                                  | 21                                                                   |
| 88  | 0                                                        | 0.1107 | 0.246  | 0      | 0.0123 | 0.0123 | 0.123  | 0.123  | 0.0492 | 0.2214 | 0      | 0.0246 | 0.1353 | 0.1722 | 29                                                                  | 33                                                                   |
| 89  | 0.1107                                                   | 0.1845 | 0.0615 | 0.0492 | 0.0123 | 0.0246 | 0.1599 | 0.0861 | 0      | 0.2214 | 0.0369 | 0.0246 | 0.0861 | 0.1722 | 33                                                                  | 33                                                                   |
| 90  | 0.0369                                                   | 0.1845 | 0.0615 | 0.0615 | 0.0246 | 0.0246 | 0.0492 | 0.0984 | 0.0738 | 0.4059 | 0.1476 | 0.0246 | 0.0123 | 0.0246 | 40                                                                  | 44                                                                   |
| 91  | 0.1323                                                   | 0.2205 | 0.0735 | 0      | 0      | 0.0294 | 0.1911 | 0.1029 | 0      | 0.4263 | 0.0441 | 0      | 0.147  | 0.1029 | 31                                                                  | 40                                                                   |
| 92  | 0.1107                                                   | 0.1107 | 0.1353 | 0.0492 | 0.1476 | 0.0123 | 0.123  | 0.0861 | 0      | 0.1722 | 0.0369 | 0.0246 | 0.1353 | 0.0861 | 29                                                                  | 31                                                                   |
| 93  | 0.0105                                                   | 0.1575 | 0.0735 | 0.0315 | 0.0735 | 0.021  | 0.0735 | 0.042  | 0.063  | 0.147  | 0.1995 | 0.084  | 0.063  | 0.0105 | 31                                                                  | 34                                                                   |
| 94  | 0.1323                                                   | 0.2205 | 0.0735 | 0.0588 | 0.0147 | 0.0294 | 0.1911 | 0.2205 | 0      | 0.2058 | 0.0441 | 0.0294 | 0.147  | 0.1029 | 31                                                                  | 35                                                                   |
| 95  | 0                                                        | 0.1107 | 0.246  | 0.0492 | 0.0123 | 0      | 0.123  | 0.123  | 0.1353 | 0.2214 | 0.0369 | 0.0246 | 0.1353 | 0.0123 | 36                                                                  | 40                                                                   |
| 96  | 0                                                        | 0.1575 | 0.0735 | 0.042  | 0.084  | 0.042  | 0.1365 | 0.021  | 0.0105 | 0.147  | 0.0315 | 0.126  | 0.105  | 0.0735 | 16                                                                  | 31                                                                   |
| 97  | 0.1029                                                   | 0.2205 | 0.0735 | 0      | 0      | 0.0294 | 0.1911 | 0.1029 | 0      | 0.2058 | 0.0441 | 0.2205 | 0.147  | 0.1323 | 27                                                                  | 35                                                                   |
| 98  | 0.1323                                                   | 0.2205 | 0.0735 | 0      | 0.1029 | 0.0294 | 0.1911 | 0      | 0      | 0.2058 | 0.0441 | 0.2205 | 0.147  | 0.1029 | 24                                                                  | 32                                                                   |
| 99  | 0.081                                                    | 0.27   | 0.135  | 0.189  | 0.243  | 0.27   | 0.108  | 0.054  | 0.27   | 0.243  | 0.135  | 0.27   | 0.162  | 0.243  | 26                                                                  | 23                                                                   |

| No. | Composition <sup>b</sup> (mmol g-support <sup>-1</sup> ) |        |        |        |        |        |        |        |        |        |        |        |        |        | Observed<br>C <sub>4</sub> H <sub>6</sub> yield <sup>c</sup><br>(%) | Predicted<br>C <sub>4</sub> H <sub>6</sub><br>yield <sup>d</sup> (%) |
|-----|----------------------------------------------------------|--------|--------|--------|--------|--------|--------|--------|--------|--------|--------|--------|--------|--------|---------------------------------------------------------------------|----------------------------------------------------------------------|
|     | Mg                                                       | Zn     | Cu     | Ag     | Ni     | Al     | La     | Y      | Hf     | Zr     | Cr     | Ga     | Nb     | Mo     |                                                                     |                                                                      |
| 100 | 0.0111                                                   | 0.0999 | 0.0444 | 0.0333 | 0.0999 | 0      | 0.111  | 0.0999 | 0.0777 | 0.0999 | 0.111  | 0.111  | 0.1332 | 0.0999 | 29                                                                  | 29                                                                   |
| 101 | 0                                                        | 0.1845 | 0.0615 | 0.0861 | 0      | 0.0492 | 0.0738 | 0.0492 | 0      | 0.0246 | 0.0369 | 0.5289 | 0.123  | 0.0123 | 15                                                                  | 26                                                                   |
| 102 | 0.1107                                                   | 0      | 0.1353 | 0.0492 | 0.1476 | 0.0123 | 0.0861 | 0.0861 | 0.2214 | 0.1722 | 0.0369 | 0.0246 | 0.0615 | 0.0861 | 20                                                                  | 23                                                                   |
| 103 | 0.0123                                                   | 0.1107 | 0.0861 | 0.0492 | 0.0984 | 0.0123 | 0.0861 | 0.123  | 0.4305 | 0.0861 | 0.0369 | 0.0246 | 0.0615 | 0.0123 | 34                                                                  | 49                                                                   |
| 104 | 0                                                        | 0.1107 | 0.246  | 0.0861 | 0.0123 | 0.0123 | 0.0738 | 0.0492 | 0.2214 | 0.0861 | 0      | 0.0246 | 0.1353 | 0.1722 | 44                                                                  | 36                                                                   |
| 105 | 0.0105                                                   | 0.1575 | 0.0525 | 0      | 0.084  | 0.021  | 0.1365 | 0.0735 | 0      | 0.147  | 0.0315 | 0.1575 | 0.105  | 0.0735 | 31                                                                  | 32                                                                   |
| 106 | 0.0615                                                   | 0.123  | 0.0984 | 0.0492 | 0.0738 | 0.123  | 0.0738 | 0.0738 | 0.0246 | 0.0615 | 0.0984 | 0.1107 | 0.1968 | 0.0615 | 17                                                                  | 23                                                                   |
| 107 | 0                                                        | 0.0945 | 0.21   | 0.0315 | 0.0105 | 0.0105 | 0.105  | 0.042  | 0.063  | 0.189  | 0      | 0.021  | 0.063  | 0.21   | 31                                                                  | 31                                                                   |
| 108 | 0.0315                                                   | 0.1575 | 0.0735 | 0.0525 | 0.084  | 0.021  | 0.042  | 0.0735 | 0.0105 | 0.3465 | 0.105  | 0.021  | 0.0105 | 0.021  | 25                                                                  | 42                                                                   |
| 109 | 0                                                        | 0.1575 | 0.0735 | 0.042  | 0.084  | 0.021  | 0.0735 | 0.105  | 0.252  | 0.147  | 0.0105 | 0.021  | 0.0525 | 0.0105 | 51                                                                  | 50                                                                   |
| 110 | 0.1107                                                   | 0.1845 | 0.0738 | 0.0492 | 0      | 0.0246 | 0.1599 | 0.0861 | 0      | 0.2214 | 0.0369 | 0.0246 | 0.0861 | 0.1722 | 33                                                                  | 36                                                                   |
| 111 | 0.0369                                                   | 0.1107 | 0.246  | 0.0615 | 0.0246 | 0.0246 | 0.0492 | 0.1722 | 0.0738 | 0.2214 | 0.1476 | 0.0246 | 0.0123 | 0.0246 | 34                                                                  | 35                                                                   |
| 112 | 0.0441                                                   | 0.3822 | 0.1029 | 0.0588 | 0.1176 | 0.0588 | 0.1029 | 0.147  | 0.0147 | 0.2646 | 0.0441 | 0.0294 | 0.0735 | 0.0294 | 44                                                                  | 44                                                                   |
| 113 | 0.1323                                                   | 0.2205 | 0.0735 | 0.0294 | 0      | 0      | 0.1911 | 0.1029 | 0      | 0.2058 | 0.0441 | 0.2205 | 0.147  | 0.1029 | 35                                                                  | 37                                                                   |
| 114 | 0.1323                                                   | 0.2205 | 0.0294 | 0      | 0      | 0.0735 | 0.1911 | 0.1029 | 0      | 0.2058 | 0.0441 | 0.2205 | 0.147  | 0.1029 | 28                                                                  | 34                                                                   |
| 115 | 0.0765                                                   | 0.102  | 0.2295 | 0.1275 | 0.255  | 0.153  | 0.204  | 0.204  | 0.1785 | 0.1785 | 0.204  | 0.2295 | 0.1785 | 0.1785 | 18                                                                  | 20                                                                   |
| 116 | 0.078                                                    | 0.1092 | 0.078  | 0.1092 | 0.1248 | 0.1404 | 0.1248 | 0.078  | 0.1092 | 0.0468 | 0.1872 | 0.0624 | 0.1404 | 0.1872 | 52                                                                  | 21                                                                   |
| 117 | 0.1107                                                   | 0.1845 | 0.246  | 0.0492 | 0      | 0.0123 | 0.123  | 0.123  | 0      | 0.2214 | 0      | 0.0246 | 0.1353 | 0      | 51                                                                  | 43                                                                   |
| 118 | 0.0369                                                   | 0.2829 | 0.0861 | 0.0492 | 0.0984 | 0.0123 | 0.123  | 0.123  | 0.0123 | 0.2214 | 0      | 0.0246 | 0.1353 | 0.0246 | 21                                                                  | 44                                                                   |
| 119 | 0.0111                                                   | 0.1665 | 0.0555 | 0.0777 | 0      | 0.0444 | 0.0666 | 0.0444 | 0      | 0.0444 | 0      | 0.4773 | 0.111  | 0.0111 | 48                                                                  | 27                                                                   |

| No. | Composition <sup>b</sup> (mmol g-support <sup>-1</sup> ) |        |        |        |        |        |        |        |        |        |        |        |        |        | Observed<br>C <sub>4</sub> H <sub>6</sub> yield <sup>c</sup><br>(%) | Predicted<br>C <sub>4</sub> H <sub>6</sub><br>yield <sup>d</sup> (%) |
|-----|----------------------------------------------------------|--------|--------|--------|--------|--------|--------|--------|--------|--------|--------|--------|--------|--------|---------------------------------------------------------------------|----------------------------------------------------------------------|
|     | Mg                                                       | Zn     | Cu     | Ag     | Ni     | Al     | La     | Y      | Hf     | Zr     | Cr     | Ga     | Nb     | Mo     |                                                                     |                                                                      |
| 120 | 0.0111                                                   | 0.1665 | 0.0444 | 0.0333 | 0.0888 | 0      | 0.222  | 0.0999 | 0.0666 | 0.0999 | 0.0111 | 0.111  | 0.0555 | 0.0999 | 43                                                                  | 39                                                                   |
| 121 | 0                                                        | 0.0861 | 0.0861 | 0.0492 | 0.0984 | 0.0492 | 0.0861 | 0.123  | 0.2952 | 0.2214 | 0.0369 | 0.0246 | 0.0615 | 0.0123 | 14                                                                  | 42                                                                   |
| 122 | 0.0105                                                   | 0.1575 | 0.0735 | 0.042  | 0.084  | 0.021  | 0.0735 | 0.105  | 0      | 0.147  | 0.0315 | 0.021  | 0.0525 | 0.231  | 29                                                                  | 30                                                                   |
| 123 | 0.0945                                                   | 0.1575 | 0.0525 | 0.042  | 0      | 0.021  | 0.1365 | 0.0315 | 0      | 0.147  | 0.0315 | 0.1575 | 0.105  | 0.0735 | 33                                                                  | 33                                                                   |
| 124 | 0.1323                                                   | 0.2205 | 0.0735 | 0      | 0      | 0.0294 | 0.1911 | 0.1029 | 0      | 0.2058 | 0.0441 | 0.2205 | 0.147  | 0.1029 | 34                                                                  | 36                                                                   |
| 125 | 0                                                        | 0      | 0.21   | 0.0735 | 0      | 0.0315 | 0.0735 | 0.042  | 0.252  | 0.0735 | 0.0315 | 0      | 0.1155 | 0.147  | 18                                                                  | 21                                                                   |
| 126 | 0.1323                                                   | 0.2205 | 0.0735 | 0      | 0      | 0      | 0.0294 | 0.1029 | 0      | 0.2058 | 0.0441 | 0.2205 | 0.147  | 0.294  | 23                                                                  | 34                                                                   |
| 127 | 0.0945                                                   | 0.1575 | 0.084  | 0      | 0.084  | 0.021  | 0.0735 | 0.105  | 0.189  | 0.147  | 0.0105 | 0.021  | 0.0525 | 0.0105 | 53                                                                  | 46                                                                   |
| 128 | 0                                                        | 0.1575 | 0.0735 | 0.042  | 0.084  | 0.021  | 0.0735 | 0.105  | 0.147  | 0.252  | 0.0105 | 0.021  | 0.0525 | 0.0105 | 49                                                                  | 47                                                                   |
| 129 | 0                                                        | 0.1575 | 0.0735 | 0.042  | 0.0105 | 0.021  | 0.0735 | 0.105  | 0.252  | 0.147  | 0.0105 | 0.021  | 0.0525 | 0.084  | 44                                                                  | 46                                                                   |
| 130 | 0.27                                                     | 0.189  | 0.081  | 0.162  | 0.135  | 0.189  | 0.216  | 0.27   | 0.216  | 0.135  | 0.297  | 0.297  | 0.027  | 0.27   | 29                                                                  | 22                                                                   |
| 131 | 0.0126                                                   | 0.0036 | 0.0126 | 0.009  | 0.0144 | 0.0216 | 0.0198 | 0.0252 | 0.018  | 0.009  | 0.0108 | 0.0162 | 0      | 0.0108 | 10                                                                  | 14                                                                   |
| 132 | 0                                                        | 0.1575 | 0.0735 | 0.042  | 0.084  | 0.021  | 0.0735 | 0.105  | 0.252  | 0.147  | 0.0105 | 0.021  | 0.0525 | 0.0105 | 49                                                                  | 50                                                                   |
| 133 | 0                                                        | 0.1575 | 0      | 0.042  | 0      | 0      | 0      | 0      | 0.147  | 0.252  | 0.0105 | 0.3255 | 0.105  | 0.0105 | 38                                                                  | 38                                                                   |
| 134 | 0.0147                                                   | 0.2205 | 0.0735 | 0.0441 | 0.1176 | 0.0294 | 0.294  | 0.1323 | 0.0882 | 0.1323 | 0.0147 | 0.0294 | 0.147  | 0.1323 | 42                                                                  | 40                                                                   |
| 135 | 0.0945                                                   | 0.1575 | 0.0735 | 0.042  | 0.084  | 0.0315 | 0.0735 | 0.105  | 0.147  | 0.147  | 0.0105 | 0.021  | 0.0525 | 0.0105 | 48                                                                  | 44                                                                   |
| 136 | 0.078                                                    | 0.234  | 0.078  | 0      | 0.1248 | 0.0312 | 0.1092 | 0.078  | 0.1092 | 0.0468 | 0.1872 | 0.0312 | 0.4368 | 0.0156 | 32                                                                  | 35                                                                   |
| 137 | 0.0525                                                   | 0.1575 | 0.0735 | 0.042  | 0.084  | 0.0105 | 0      | 0.105  | 0.252  | 0.147  | 0.0105 | 0      | 0.1155 | 0      | 47                                                                  | 49                                                                   |
| 138 | 0.0525                                                   | 0.0735 | 0.0525 | 0      | 0.0105 | 0.0945 | 0.084  | 0.105  | 0.0735 | 0.252  | 0.126  | 0.021  | 0.0945 | 0.0105 | 25                                                                  | 25                                                                   |
| 139 | 0.078                                                    | 0.1092 | 0.312  | 0.1092 | 0.1248 | 0      | 0.1092 | 0.0624 | 0.1092 | 0.0468 | 0.1872 | 0.0624 | 0.1716 | 0.0936 | 28                                                                  | 25                                                                   |

| No. | Composition <sup>b</sup> (mmol g-support <sup>-1</sup> ) |        |        |        |        |        |        |        |        |        |        |        |        |        | Observed                                                | Predicted                                               |
|-----|----------------------------------------------------------|--------|--------|--------|--------|--------|--------|--------|--------|--------|--------|--------|--------|--------|---------------------------------------------------------|---------------------------------------------------------|
|     | Mg                                                       | Zn     | Cu     | Ag     | Ni     | Al     | La     | Y      | Hf     | Zr     | Cr     | Ga     | Nb     | Mo     | C <sub>4</sub> H <sub>6</sub> yield <sup>c</sup><br>(%) | C <sub>4</sub> H <sub>6</sub><br>yield <sup>d</sup> (%) |
| 140 | 0                                                        | 0.0555 | 0.0777 | 0.0444 | 0.0888 | 0.0222 | 0.0777 | 0.0999 | 0.2664 | 0.0999 | 0.0111 | 0.111  | 0.0555 | 0.0999 | 27                                                      | 34                                                      |
| 141 | 0.1107                                                   | 0.1845 | 0.246  | 0.0369 | 0      | 0.0123 | 0.123  | 0.123  | 0      | 0.2214 | 0      | 0.0246 | 0.1353 | 0.0123 | 47                                                      | 42                                                      |
| 142 | 0.1323                                                   | 0.2205 | 0.1029 | 0      | 0      | 0.0294 | 0.1911 | 0.0294 | 0.3528 | 0.2058 | 0.0441 | 0      | 0.147  | 0.0147 | 51                                                      | 50                                                      |
| 143 | 0                                                        | 0.1575 | 0.0735 | 0      | 0.084  | 0      | 0.0735 | 0.105  | 0      | 0.147  | 0      | 0.126  | 0.0525 | 0.231  | 30                                                      | 30                                                      |
| 144 | 0.021                                                    | 0.1575 | 0.084  | 0      | 0.084  | 0.021  | 0.0735 | 0.105  | 0.189  | 0.147  | 0.0105 | 0.0945 | 0.0525 | 0.0105 | 43                                                      | 46                                                      |
| 145 | 0.0945                                                   | 0.1575 | 0.084  | 0      | 0.084  | 0.105  | 0.0735 | 0.021  | 0.189  | 0.147  | 0.0105 | 0.021  | 0.0525 | 0.0105 | 33                                                      | 41                                                      |
| 146 | 0.1275                                                   | 0.204  | 0.2295 | 0.1785 | 0.1275 | 0.1275 | 0.306  | 0.0765 | 0.1275 | 0.2805 | 0.2295 | 0.306  | 0.102  | 0.1275 | 23                                                      | 24                                                      |
| 147 | 0.1701                                                   | 0.0486 | 0.3159 | 0.1215 | 0.0972 | 0.1458 | 0.0486 | 0.1944 | 0.2916 | 0.243  | 0.3159 | 0.0486 | 0.3159 | 0.0486 | 17                                                      | 18                                                      |
| 148 | 0                                                        | 0.105  | 0.0735 | 0.063  | 0.084  | 0.0735 | 0.084  | 0.105  | 0.084  | 0.0525 | 0.1155 | 0.1155 | 0.0105 | 0.105  | 25                                                      | 26                                                      |
| 149 | 0.0945                                                   | 0.1575 | 0.084  | 0      | 0      | 0.021  | 0.0735 | 0.105  | 0.252  | 0.147  | 0      | 0      | 0.105  | 0.0105 | 54                                                      | 50                                                      |
| 150 | 0.0945                                                   | 0.1575 | 0.0735 | 0.042  | 0.063  | 0.0105 | 0.0735 | 0.105  | 0.147  | 0.189  | 0.0105 | 0.021  | 0.0525 | 0.0105 | 52                                                      | 45                                                      |
| 151 | 0.0945                                                   | 0.1575 | 0.21   | 0.042  | 0.084  | 0.0105 | 0      | 0.105  | 0.021  | 0.189  | 0.0105 | 0      | 0.1155 | 0.0105 | 44                                                      | 39                                                      |
| 152 | 0.0945                                                   | 0.1575 | 0.084  | 0      | 0.084  | 0.021  | 0.0735 | 0.105  | 0.189  | 0.147  | 0.0105 | 0.021  | 0.0525 | 0.0105 | 48                                                      | 46                                                      |
| 153 | 0                                                        | 0.1575 | 0.0735 | 0.042  | 0.084  | 0.021  | 0.0735 | 0.105  | 0.252  | 0.147  | 0.0105 | 0.021  | 0.0525 | 0.0105 | 57                                                      | 50                                                      |
| 154 | 0.1323                                                   | 0.2205 | 0.294  | 0.0588 | 0      | 0.0147 | 0.1911 | 0.0294 | 0.3528 | 0.0882 | 0.0441 | 0.0294 | 0      | 0.0147 | 41                                                      | 50                                                      |
| 155 | 0.0945                                                   | 0.1575 | 0.084  | 0.042  | 0.084  | 0.021  | 0.0735 | 0.2625 | 0      | 0.147  | 0.0105 | 0.021  | 0.0525 | 0      | 38                                                      | 40                                                      |
| 156 | 0                                                        | 0.1575 | 0.084  | 0.042  | 0.084  | 0.021  | 0.126  | 0.105  | 0.189  | 0.147  | 0.0105 | 0.021  | 0.0525 | 0.0105 | 41                                                      | 47                                                      |
| 157 | 0.0945                                                   | 0.0525 | 0.105  | 0      | 0.084  | 0.021  | 0.0735 | 0.105  | 0.189  | 0.147  | 0.0105 | 0.105  | 0.0525 | 0.0105 | 31                                                      | 35                                                      |
| 158 | 0.0126                                                   | 0.0126 | 0.0054 | 0.0108 | 0.009  | 0.0126 | 0.0144 | 0.018  | 0.0144 | 0.009  | 0.027  | 0.0198 | 0.0018 | 0.018  | 14                                                      | 14                                                      |
| 159 | 0.021                                                    | 0.1575 | 0.0735 | 0      | 0.168  | 0.021  | 0.0735 | 0.105  | 0.189  | 0.147  | 0.0105 | 0.021  | 0.0525 | 0.0105 | 45                                                      | 48                                                      |

| No. | Composition <sup>b</sup> (mmol g-support <sup>-1</sup> ) |        |        |        |        |        |        |        |        |        |        |        |        |        | Observed<br>C <sub>4</sub> H <sub>6</sub> yield <sup>c</sup><br>(%) | Predicted<br>C <sub>4</sub> H <sub>6</sub><br>yield <sup>d</sup> (%) |
|-----|----------------------------------------------------------|--------|--------|--------|--------|--------|--------|--------|--------|--------|--------|--------|--------|--------|---------------------------------------------------------------------|----------------------------------------------------------------------|
|     | Mg                                                       | Zn     | Cu     | Ag     | Ni     | Al     | La     | Y      | Hf     | Zr     | Cr     | Ga     | Nb     | Mo     |                                                                     |                                                                      |
| 160 | 0.0945                                                   | 0.1575 | 0.084  | 0      | 0.105  | 0.021  | 0.0735 | 0.084  | 0.189  | 0.147  | 0.0105 | 0.021  | 0.0525 | 0.0105 | 44                                                                  | 46                                                                   |
| 161 | 0.0945                                                   | 0.1575 | 0.084  | 0.0105 | 0.084  | 0.021  | 0.0735 | 0.105  | 0.189  | 0.147  | 0      | 0.021  | 0.0525 | 0.0105 | 42                                                                  | 47                                                                   |
| 162 | 0.0498                                                   | 0.0747 | 0.3486 | 0.2988 | 0.0747 | 0.1494 | 0.0996 | 0.2241 | 0.1494 | 0.1743 | 0.0747 | 0.1743 | 0.3486 | 0.249  | 21                                                                  | 16                                                                   |
| 163 | 0.168                                                    | 0.036  | 0.096  | 0.036  | 0.192  | 0.012  | 0.084  | 0.132  | 0      | 0.156  | 0.132  | 0.06   | 0.072  | 0.024  | 24                                                                  | 23                                                                   |
| 164 | 0                                                        | 0.1575 | 0.0735 | 0.042  | 0.084  | 0.021  | 0.0735 | 0.105  | 0.252  | 0.147  | 0.0105 | 0.021  | 0.0525 | 0.0105 | 50                                                                  | 50                                                                   |
| 165 | 0                                                        | 0.1575 | 0.084  | 0.042  | 0.084  | 0.021  | 0.126  | 0.105  | 0.252  | 0.084  | 0.0105 | 0.021  | 0.0525 | 0.0105 | 51                                                                  | 49                                                                   |
| 166 | 0                                                        | 0.1575 | 0.0735 | 0.042  | 0.084  | 0.021  | 0.0735 | 0.105  | 0.252  | 0.147  | 0.0105 | 0.021  | 0.0525 | 0.0105 | 52                                                                  | 50                                                                   |
| 167 | 0.1323                                                   | 0.147  | 0.1029 | 0      | 0.1176 | 0      | 0.1911 | 0.0294 | 0.3528 | 0.2058 | 0.0441 | 0.1176 | 0.0147 | 0.0147 | 51                                                                  | 46                                                                   |
| 168 | 0.078                                                    | 0.1092 | 0.078  | 0.1092 | 0.1248 | 0.1404 | 0.1248 | 0.078  | 0.1092 | 0.0468 | 0.1872 | 0.0468 | 0.1404 | 0.1872 | 24                                                                  | 21                                                                   |
| 169 | 0.1323                                                   | 0.2205 | 0.1029 | 0      | 0.0588 | 0.0294 | 0.1029 | 0.0294 | 0.3528 | 0.2058 | 0.0441 | 0.0294 | 0.147  | 0.0147 | 44                                                                  | 48                                                                   |
| 170 | 0.0945                                                   | 0.1575 | 0.0735 | 0      | 0      | 0.021  | 0.0735 | 0.147  | 0.252  | 0.147  | 0      | 0.021  | 0.0525 | 0.0105 | 36                                                                  | 51                                                                   |
| 171 | 0.0945                                                   | 0.1575 | 0.084  | 0.042  | 0.084  | 0.021  | 0      | 0.105  | 0.252  | 0.147  | 0.0105 | 0.021  | 0.021  | 0.0105 | 48                                                                  | 49                                                                   |
| 172 | 0.0945                                                   | 0.126  | 0.0735 | 0.042  | 0.084  | 0.021  | 0      | 0.2625 | 0.252  | 0      | 0.0105 | 0.021  | 0.0525 | 0.0105 | 49                                                                  | 41                                                                   |
| 173 | 0                                                        | 0.1575 | 0.084  | 0.063  | 0.084  | 0.021  | 0.0735 | 0.105  | 0.0735 | 0.0525 | 0.1995 | 0.1155 | 0.0105 | 0.0105 | 38                                                                  | 33                                                                   |
| 174 | 0                                                        | 0.1575 | 0.084  | 0.042  | 0.084  | 0.021  | 0.126  | 0.105  | 0.189  | 0.147  | 0.0105 | 0.021  | 0.0525 | 0.0105 | 48                                                                  | 47                                                                   |
| 175 | 0.0945                                                   | 0.1575 | 0.084  | 0      | 0.084  | 0.021  | 0.0735 | 0.105  | 0.189  | 0.147  | 0.0105 | 0.021  | 0.0525 | 0.0105 | 53                                                                  | 46                                                                   |
| 176 | 0                                                        | 0.1575 | 0.0735 | 0.042  | 0.084  | 0.021  | 0.0735 | 0.105  | 0.252  | 0.147  | 0.0105 | 0.021  | 0.0525 | 0.0105 | 50                                                                  | 50                                                                   |
| 177 | 0                                                        | 0.1575 | 0.0735 | 0.105  | 0.084  | 0.021  | 0.0735 | 0.042  | 0.252  | 0.147  | 0.0105 | 0.021  | 0.0525 | 0.0105 | 50                                                                  | 50                                                                   |

<sup>a</sup> The data were curated from a previous study<sup>5</sup>; <sup>b</sup> Catalysts comprise up to 14 elements co-supported on SBA-15 with varied compositions;

<sup>c</sup> Measured at 400 °C and 21.8 mL min<sup>-1</sup> of 8.4% ethanol in Ar; <sup>d</sup> Obtained using a Huber regressor with eight selected first-order features.

**Table S4: Dataset for three-way catalysis<sup>a</sup>**

| No. | Nanoparticle <sup>b</sup> | Observed T <sub>50</sub> <sup>c</sup> (°C) | Predicted T <sub>50</sub> <sup>d</sup> (°C) |
|-----|---------------------------|--------------------------------------------|---------------------------------------------|
| 1   | RhPd                      | 252                                        | 262                                         |
| 2   | RhPt                      | 266                                        | 290                                         |
| 3   | CuRh                      | 279                                        | 279                                         |
| 4   | RuPd                      | 309                                        | 311                                         |
| 5   | CuPd                      | 319                                        | 317                                         |
| 6   | CuRhPd                    | 272                                        | 269                                         |
| 7   | RuRhPd                    | 277                                        | 275                                         |
| 8   | NiRhPd                    | 279                                        | 279                                         |
| 9   | FeRhPd                    | 283                                        | 268                                         |
| 10  | CuRhPt                    | 287                                        | 288                                         |
| 11  | CoRhPd                    | 290                                        | 267                                         |
| 12  | NiRhPt                    | 291                                        | 296                                         |
| 13  | CoRhPt                    | 291                                        | 289                                         |
| 14  | FeRhPt                    | 294                                        | 289                                         |
| 15  | RuRhPt                    | 295                                        | 295                                         |
| 16  | RhPdPt                    | 296                                        | 278                                         |
| 17  | FeRuPd                    | 309                                        | 328                                         |
| 18  | CoRuPd                    | 324                                        | 329                                         |
| 19  | CoPdPt                    | 332                                        | 332                                         |
| 20  | CuPdPt                    | 333                                        | 329                                         |
| 21  | NiRuPd                    | 341                                        | 341                                         |
| 22  | FePdPt                    | 366                                        | 330                                         |
| 23  | CoRuPt                    | 367                                        | 350                                         |
| 24  | FeRhPdPt                  | 262                                        | 279                                         |
| 25  | CrCuRhPd                  | 267                                        | 278                                         |
| 26  | CuRhPdPt                  | 269                                        | 279                                         |
| 27  | FeCoRhPd                  | 271                                        | 271                                         |
| 28  | FeCuRhPd                  | 272                                        | 272                                         |
| 29  | CoCuRhPd                  | 273                                        | 273                                         |
| 30  | MnFeRuRh                  | 290                                        | 290                                         |
| 31  | CrMnPdIr                  | 338                                        | 337                                         |
| 32  | CrNiPdAg                  | 367                                        | 350                                         |
| 33  | CoRhPdAgPt                | 266                                        | 289                                         |
| 34  | CoNiRuRhPd                | 272                                        | 286                                         |

| No. | Nanoparticle <sup>b</sup> | Observed T <sub>50</sub> <sup>c</sup> (°C) | Predicted T <sub>50</sub> <sup>d</sup> (°C) |
|-----|---------------------------|--------------------------------------------|---------------------------------------------|
| 35  | CoNiRhPdPt                | 274                                        | 285                                         |
| 36  | RhPdAgIrPt                | 276                                        | 291                                         |
| 37  | FeCoRuRhIr                | 293                                        | 294                                         |
| 38  | FeCoNiPdPt                | 293                                        | 339                                         |
| 39  | CrMnCuRhAg                | 296                                        | 296                                         |
| 40  | NiRhPdInPt                | 296                                        | 296                                         |
| 41  | CrRuRhPdPt                | 298                                        | 287                                         |
| 42  | FeNiRhPdPt                | 301                                        | 287                                         |
| 43  | MnRuRhPdPt                | 307                                        | 286                                         |
| 44  | RuRhPdAgPt                | 309                                        | 291                                         |
| 45  | CrMnCuPdPt                | 321                                        | 337                                         |
| 46  | FeCoRhPdPt                | 326                                        | 282                                         |
| 47  | MnCuRuPdPt                | 330                                        | 337                                         |
| 48  | CoNiRuAgPt                | 354                                        | 357                                         |
| 49  | NiCuRhInIr                | 355                                        | 304                                         |
| 50  | CrNiRuPdAg                | 362                                        | 352                                         |
| 51  | FeNiAgIrPt                | 375                                        | 357                                         |

<sup>a</sup> The data were curated from a previous study<sup>6</sup>; <sup>b</sup> Bimetallic to pentametallic nanoparticles with equimolar compositions are supported on  $\gamma$ -Al<sub>2</sub>O<sub>3</sub> at 0.3 wt%; <sup>c</sup> Temperature at 50% NO conversion under stoichiometric conditions; <sup>d</sup> Obtained using a Huber regressor with eight selected first-order features.



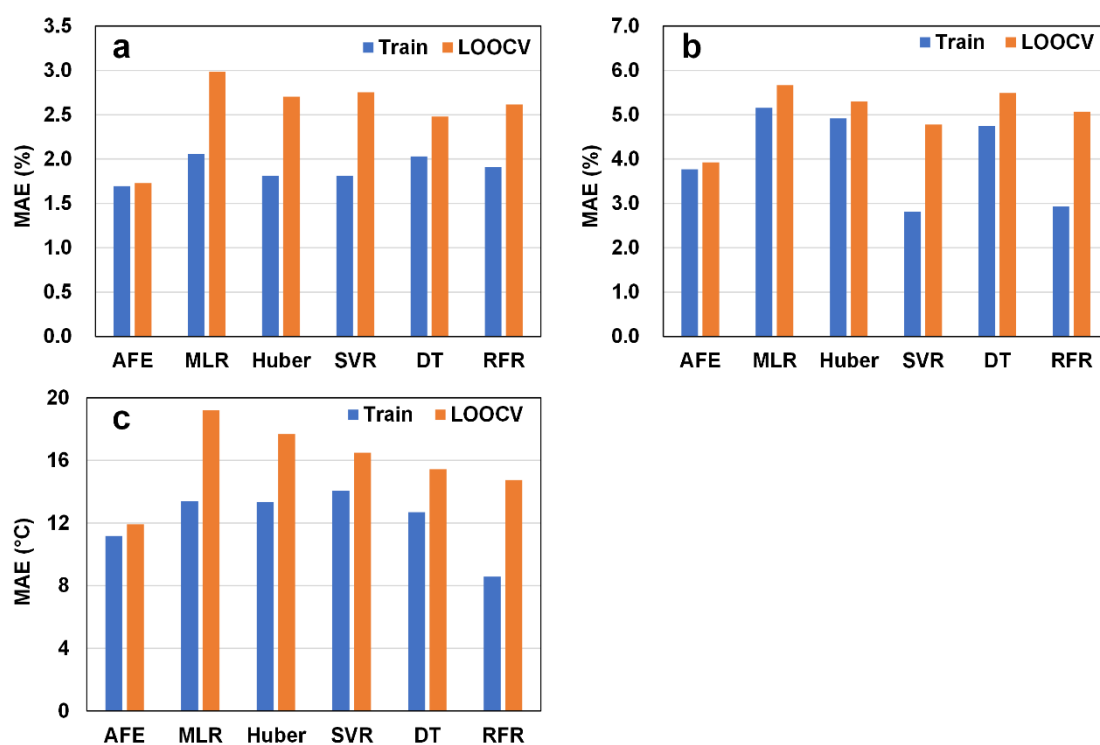

**Figure S1: Performance comparison between automatic feature engineering (AFE) and typical regression methods.** Mean absolute error (MAE) values in training and leave-one-out cross-validation (LOOCV) are compared across AFE, multiple linear regression (MLE), Huber regression (Huber), support vector regression (SVR), regression tree (DT), and random forest regression (RFR) for predicting (a)  $C_2$  yields in the oxidative coupling of methane (OCM), (b) butadiene yields in ethanol conversion, and (c) light-off temperatures for NO conversion in three-way catalysis. In AFE, eight features that minimized the MAE in LOOCV with Huber regression were selected (see Figures 1b–d). In the other methods, catalyst elemental compositions were directly used as explanatory variables, with hyperparameters (if applicable) optimized through a Bayesian search.

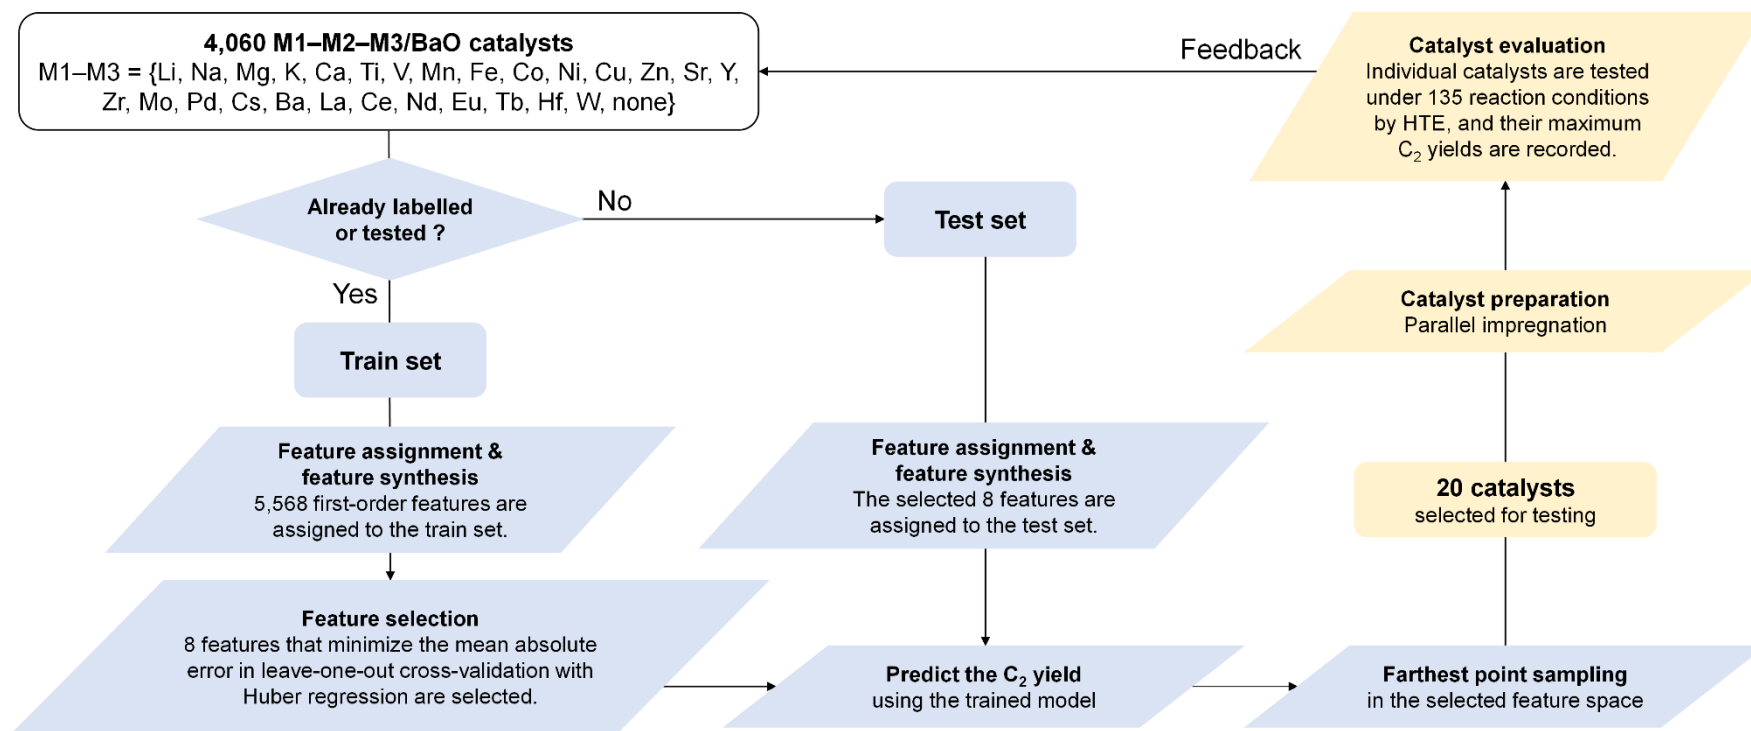

Figure S2: Flowchart of the active learning used for identifying a globally fit model in OCM.

**Table S5: Active learning results for the oxidative coupling of methane<sup>a</sup>**

| No. <sup>b</sup> | M1–M2–M3 | Observed C <sub>2</sub> yield (%) | Predicted C <sub>2</sub> yield (%) |
|------------------|----------|-----------------------------------|------------------------------------|
| 1–1              | Cs–Cs–Cs | 20.6                              | >30                                |
| 1–2              | Ba–Ba–Ba | 5.5                               | >30                                |
| 1–3              | Fe–Ni–Pd | 3.9                               | –3.7                               |
| 1–4              | Pd–Pd–Pd | 7.1                               | 6.6                                |
| 1–5              | Co–Cu–Pd | 6.9                               | –4.7                               |
| 1–6              | Li–Ni–Pd | 19.3                              | –11.4                              |
| 1–7              | K–K–K    | 9.7                               | 11.0                               |
| 1–8              | Co–Co–Co | 0.0                               | 14.7                               |
| 1–9              | Y–Zr–Pd  | 14.1                              | 2.0                                |
| 1–10             | Mn–Mn–Mn | 21.1                              | 12.7                               |
| 1–11             | Nd–Nd–Nd | 17.3                              | –6.2                               |
| 1–12             | K–Cs–Cs  | 18.1                              | 24.0                               |
| 1–13             | Fe–Ni–Mo | 19.7                              | 13.2                               |
| 1–14             | Mo–Mo–Mo | 7.0                               | 22.8                               |
| 1–15             | Fe–Pd–W  | 11.5                              | 0.4                                |
| 1–16             | Cu–Mo–Pd | 6.4                               | –5.8                               |
| 1–17             | Ni–Ni–Ni | 5.2                               | 10.4                               |
| 1–18             | Mn–Y–Pd  | 18.6                              | –3.1                               |
| 1–19             | K–Mo–La  | 18.8                              | 17.5                               |
| 1–20             | Sr–Zr–La | 20.1                              | 10.8                               |
| 2–1              | W–W–W    | 21.1                              | <–30                               |
| 2–2              | Mn–Fe–Pd | 13.7                              | 10.0                               |
| 2–3              | Mn–Fe–Mo | 17.0                              | 12.6                               |
| 2–4              | Mn–Mn–Zn | 16.8                              | 16.7                               |
| 2–5              | Mn–Co–Hf | 13.4                              | 7.6                                |
| 2–6              | Co–Pd–Cs | 6.9                               | 8.7                                |
| 2–7              | Ni–Mo–Mo | 18.3                              | 7.0                                |
| 2–8              | Mg–Zn–Zn | 18.6                              | 16.3                               |
| 2–9              | Mn–Ni–Pd | 9.7                               | 3.3                                |
| 2–10             | Ni–Zn–Sr | 10.0                              | 7.3                                |
| 2–11             | Mn–Fe–Cs | 17.5                              | 15.0                               |
| 2–12             | Mn–Mn–Fe | 14.6                              | 13.8                               |
| 2–13             | Mg–Mg    | 17.0                              | 21.1                               |

| No. <sup>b</sup> | M1–M2–M3 | Observed C <sub>2</sub> yield (%) | Predicted C <sub>2</sub> yield (%) |
|------------------|----------|-----------------------------------|------------------------------------|
| 2–14             | Zn–Zn–Ce | 18.0                              | 11.2                               |
| 2–15             | K–Fe–Pd  | 7.3                               | 13.2                               |
| 2–16             | Mn–Co–Cu | 7.8                               | 7.8                                |
| 2–17             | Sr–Sr–Cs | 18.2                              | 23.9                               |
| 2–18             | Ca–Co–Ni | 10.6                              | 8.2                                |
| 2–19             | Mn–Y–Pd  | 5.1                               | 7.1                                |
| 2–20             | Li–Ni–Pd | 5.5                               | 7.8                                |
| 3–1              | Pd–Cs–Cs | 0.0                               | 11.2                               |
| 3–2              | Cu–Pd–Cs | 5.5                               | 2.6                                |
| 3–3              | Ni–Cs–Cs | 7.6                               | 12.8                               |
| 3–4              | Cu–Zn–Zn | 7.3                               | 9.0                                |
| 3–5              | Mn–Cs–Cs | 10.6                              | 12.9                               |
| 3–6              | Co–Cs–Cs | 13.1                              | 14.5                               |
| 3–7              | Mg–Mg–Mn | 17.2                              | 12.7                               |
| 3–8              | Pd–W–W   | 0.0                               | 13.5                               |
| 3–9              | Ba–Ce–Ce | 14.5                              | 10.4                               |
| 3–10             | Cu–W–W   | 7.4                               | 10.5                               |
| 3–11             | Na–K     | 17.4                              | 16.0                               |
| 3–12             | Na–Cs–Cs | 16.5                              | 21.1                               |
| 3–13             | Mn–Mn–W  | 16.4                              | 13.7                               |
| 3–14             | K–Zn–Cs  | 18.5                              | 15.2                               |
| 3–15             | Hf–Hf–Hf | 17.3                              | 14.5                               |
| 3–16             | Zn–Mo–Pd | 11.7                              | 13.8                               |
| 3–17             | Eu–Eu–Eu | 19.4                              | 12.9                               |
| 3–18             | Zr–Cs–Cs | 17.2                              | 20.0                               |
| 3–19             | Mo–Mo–Mo | 18.9                              | 19.1                               |
| 3–20             | Mg–Pd–Ce | 0.0                               | 10.3                               |
| 4–1              | Na–Na–Na | 16.1                              | 9.3                                |
| 4–2              | Sr–Ba–Ba | 15.2                              | 13.3                               |
| 4–3              | Co–Mo–Pd | 9.5                               | 7.9                                |
| 4–4              | Na–Mg–Zn | 16.0                              | 11.7                               |
| 4–5              | Na–Ca–Ti | 14.8                              | 10.9                               |
| 4–6              | Nd       | 18.3                              | 13.6                               |
| 4–7              | Na–Mg–Ni | 2.0                               | 4.5                                |

| No. <sup>b</sup> | M1–M2–M3 | Observed C <sub>2</sub> yield (%) | Predicted C <sub>2</sub> yield (%) |
|------------------|----------|-----------------------------------|------------------------------------|
| 4–8              | K–Cu–Mo  | 7.1                               | 11.5                               |
| 4–9              | Na–Mg–Mg | 14.8                              | 12.0                               |
| 4–10             | Zn–Nd–W  | 17.2                              | 17.3                               |
| 4–11             | Mn–Mn–Cu | 7.0                               | 9.1                                |
| 4–12             | Ca       | 14.8                              | 12.1                               |
| 4–13             | Mg–Ca–Cu | 5.7                               | 4.9                                |
| 4–14             | Mg–Mg–Nd | 17.0 <sup>c</sup>                 | 21.9                               |
| 4–15             | Mg–Nd    | 17.5 <sup>c</sup>                 | 21.4                               |
| 4–16             | Mg–Nd–Nd | 17.4 <sup>c</sup>                 | 21.2                               |
| 4–17             | Mn–Mn    | 11.3 <sup>c</sup>                 | 21.1                               |
| 4–18             | Mn       | 11.4 <sup>c</sup>                 | 20.7                               |
| 4–19             | Ca–W     | 17.7                              | 17.1                               |
| 4–20             | Pd–W–W   | 0.0                               | 9.8                                |

<sup>a</sup> Observed and predicted C<sub>2</sub> yields acquired in the course of active learning; <sup>b</sup> 20 catalysts were added per cycle, where Nos. 1–18 are the catalysts selected via farthest point sampling in the feature space and Nos. 19 and 20 are the catalysts which exhibited the highest absolute errors during training in the previous cycle; <sup>c</sup> The farthest point sampling was limited to the catalysts with the predicted C<sub>2</sub> yield above 15%.

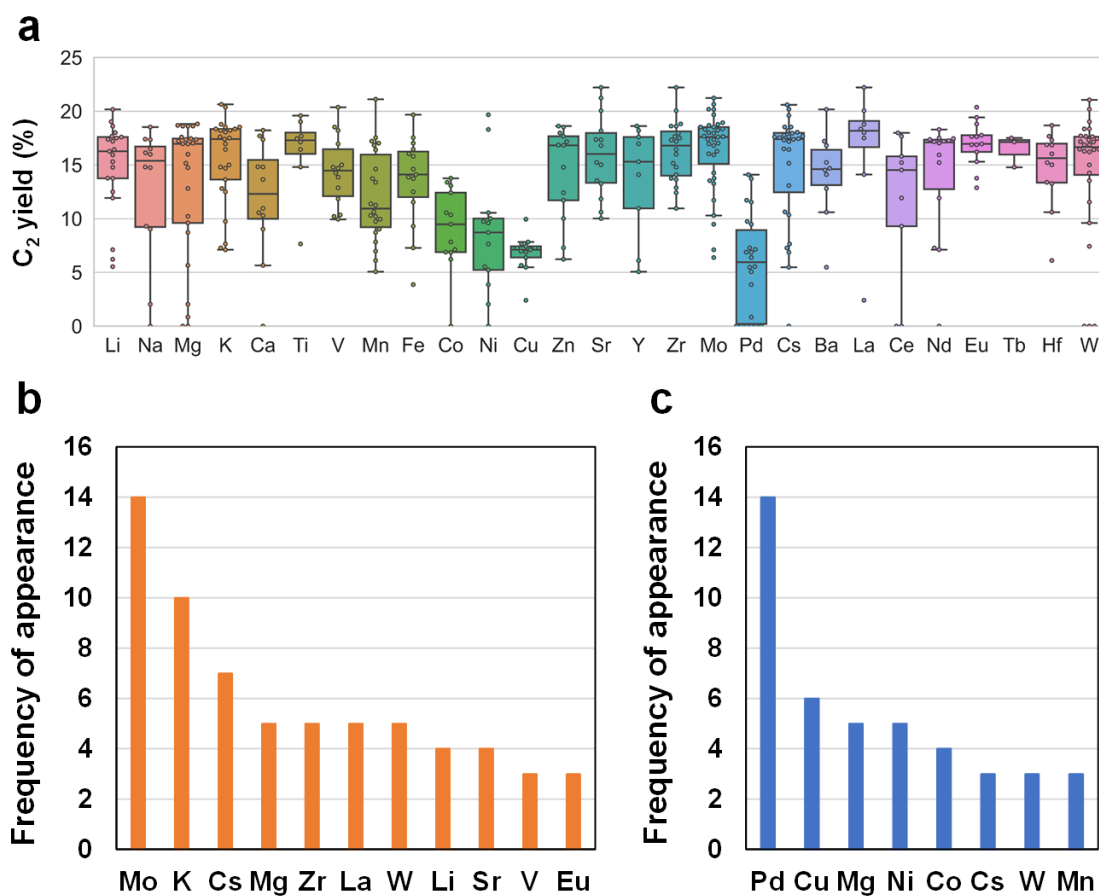

**Figure S3: Statistical analysis of catalyst performance with respect to individual elements.** (a)  $C_2$  yield distribution for each element shown in the box and swarm plots, where the line: the median value, the box: the interquartile range (IQR), and the whisker: 1.5 times the IQR with any data points beyond the whisker regarded as outliers. Elements that are frequently present in the catalysts with a  $C_2$  yield (b) above 18% and (c) below 7%. Mg appears in both the rankings.

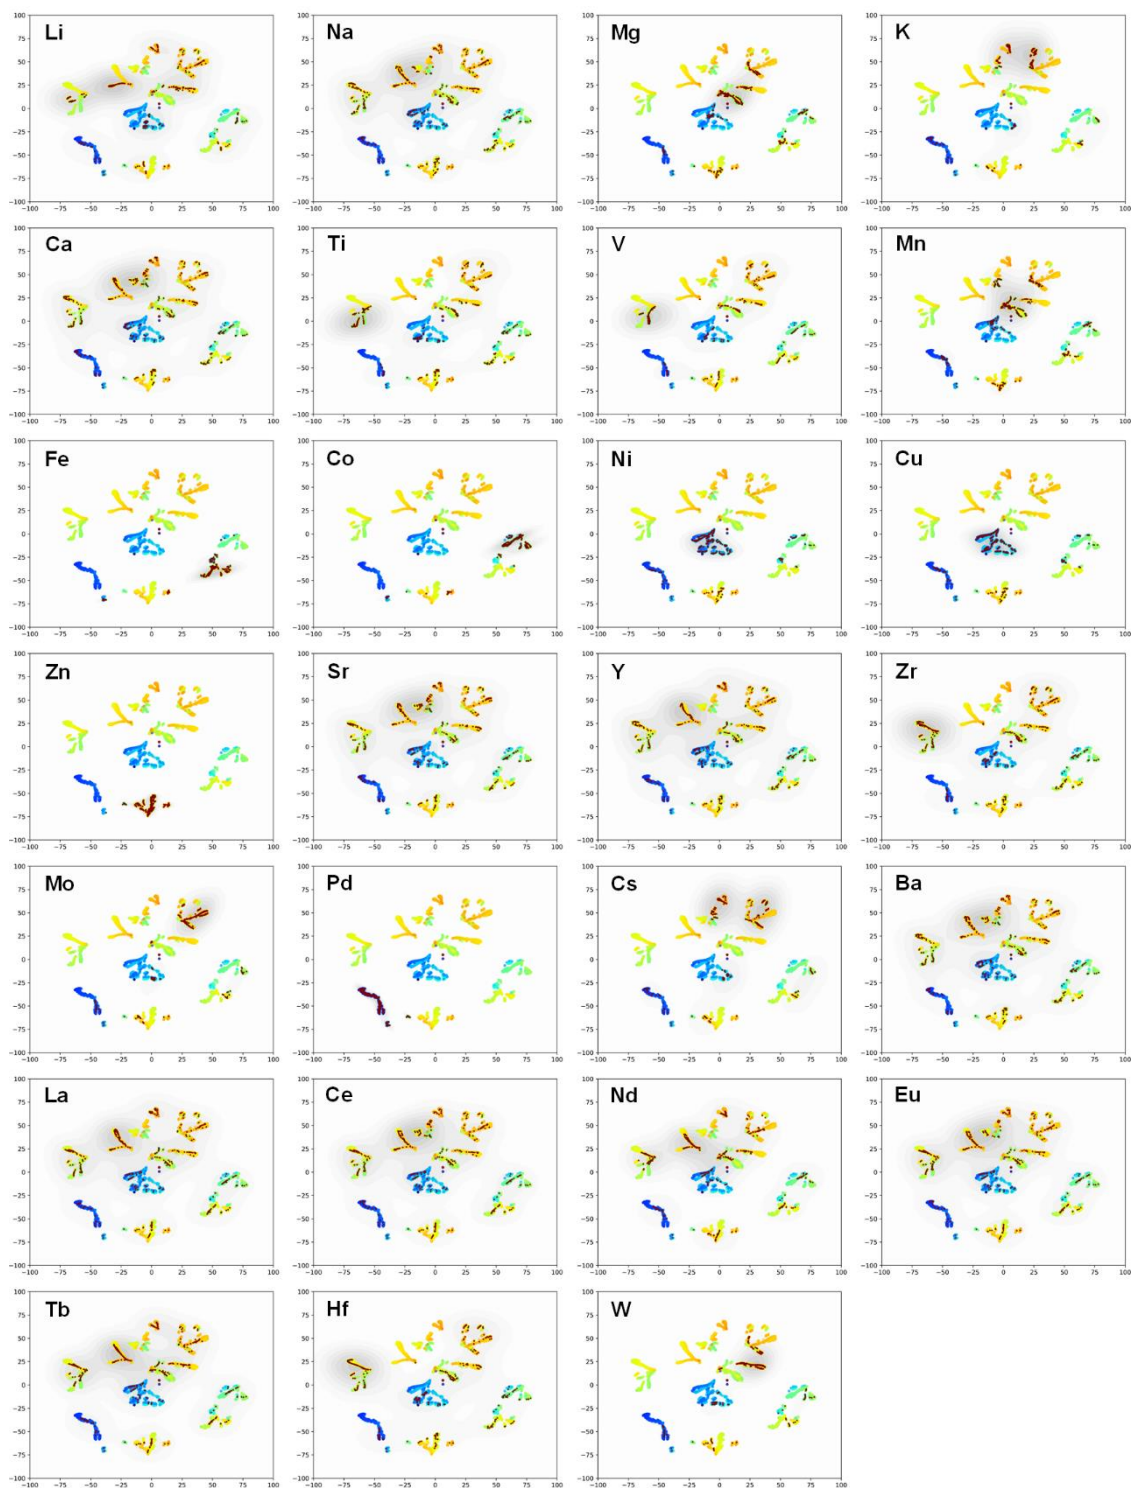

**Figure S4: Element-wise distribution in the feature space.** The feature space of the latest model is visualized by t-SNE. The black dots represent catalysts containing a specified element with the estimated Gaussian kernel density. The color corresponds to the predicted C<sub>2</sub> yield in the range of 25% (red) to 0% (blue).

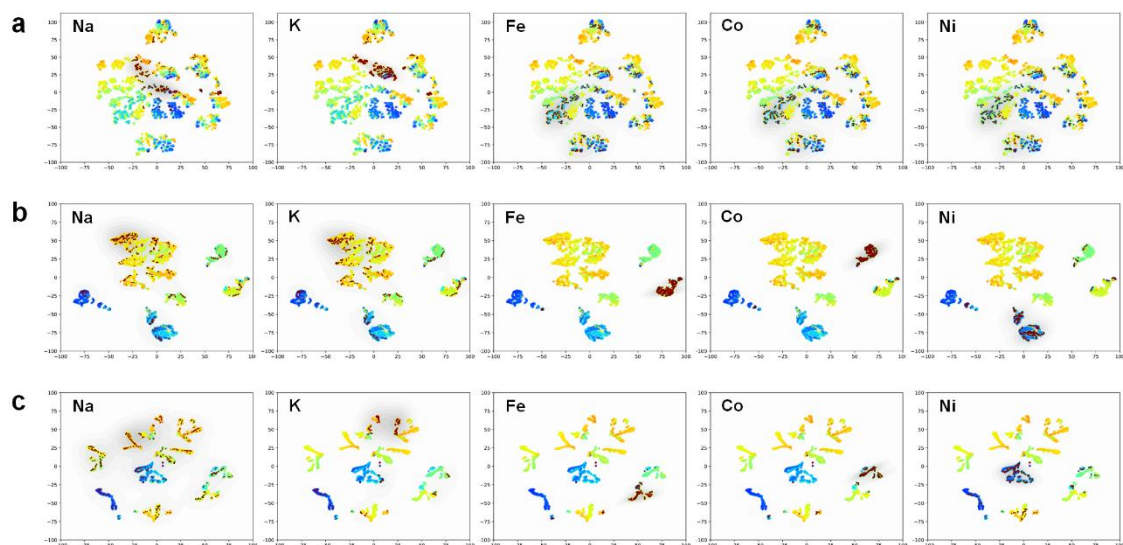

**Figure S5: Development of machine perception.** In **a–c**, all the primary features, the eight selected first-order features for the initial training dataset, and the eight selected first-order features at the end of the active learning are used as the input of t-SNE visualization, respectively. The distribution of selected elements in the respective t-SNE spaces is presented with black dots and Gaussian kernel density estimation.



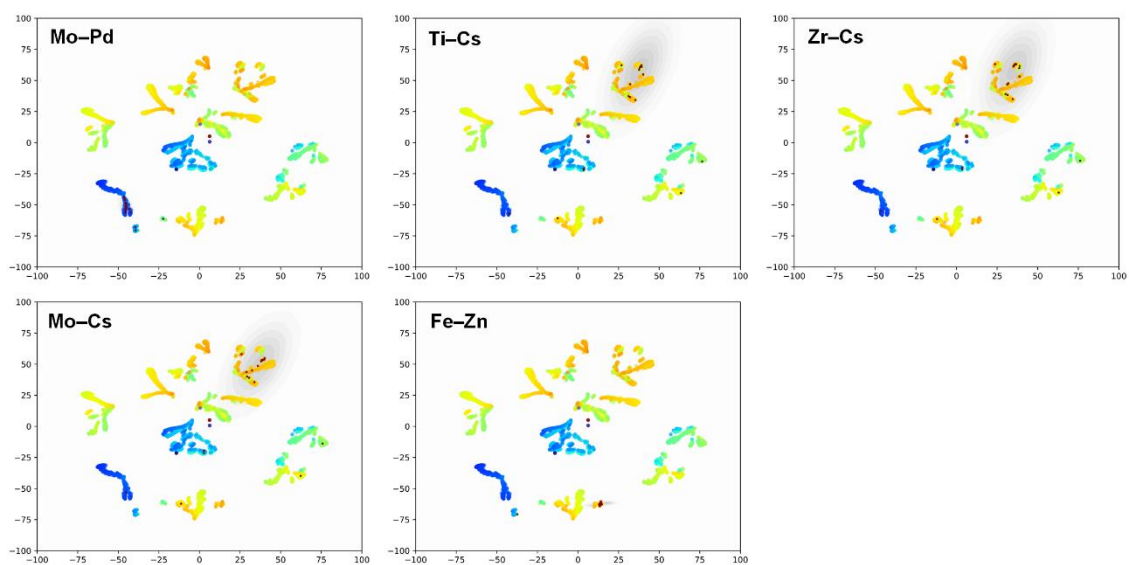

**Figure S6: Visualization of combinatorial rules using t-SNE.** The black dots represent catalysts containing a specified binary combination with the estimated Gaussian kernel density. The color corresponds to the predicted C<sub>2</sub> yield in the range of 25% (red) to 0% (blue).

**Table S6: Performance of selected catalysts in the oxidative coupling of methane<sup>a</sup>**

| M1–M2–M3 | Observed C <sub>2</sub> yield (%) |
|----------|-----------------------------------|
| Fe–Fe–Fe | 20.4                              |
| K–Fe–Zn  | 17.8                              |
| Fe–Zn    | 18.9                              |
| Fe       | 19.4                              |
| K–Co–Zn  | 10.4                              |
| Li–Fe–Zn | 14.0                              |
| Cs       | 15.0                              |
| Co–Zn    | 11.8                              |
| Ca–Fe–Zn | 19.6                              |
| Mg–K     | 15.0                              |
| Ti       | 17.3                              |
| K–Zn     | 16.5                              |
| Na       | 15.8                              |
| Mo       | 20.1                              |
| Ce       | 18.6                              |
| Fe–Ni–Zn | 15.3                              |
| Eu–Eu    | 18.1                              |
| K        | 16.8                              |
| Zn–Zn–Zn | 17.5                              |
| Mo–Mo–Ce | 13.0                              |
| Zn–Mo    | 19.3                              |
| Fe–Mo–Eu | 19.8                              |
| V–Zn–Zn  | 12.5                              |
| Ti–Mo–Mo | 14.1                              |
| Ti–Zn–Mo | 18.7                              |
| V–Hf–Hf  | 16.1                              |
| Fe–Mo–Mo | 18.0                              |
| Mo–Mo–W  | 18.9                              |
| Zr–La–La | 19.6                              |
| V–La–La  | 18.9                              |
| Ti–V–W   | 16.3                              |
| Ti–W–W   | 19.6                              |
| Ti–La–La | 19.3                              |

| M1–M2–M3 | Observed C <sub>2</sub> yield (%) |
|----------|-----------------------------------|
| Na–Tb–Tb | 16.0                              |
| Li–Ti–Zr | 16.2                              |
| Fe–Mo–La | 20.1                              |

<sup>a</sup> 36 catalysts, chosen from a subset of catalysts with predicted C<sub>2</sub> yields  $\geq$  15% using farthest point sampling, were experimentally tested.

**Table S7: Model performance in various cases<sup>a</sup>**

| No. | Feature set <sup>b</sup> | Feature selection <sup>c</sup> | Regression method <sup>d</sup> | R <sup>2</sup> <sub>train</sub> | R <sup>2</sup> <sub>CV</sub> <sup>e</sup> |
|-----|--------------------------|--------------------------------|--------------------------------|---------------------------------|-------------------------------------------|
| 1   | S                        | n.a.                           | Huber                          | 0.27                            | -1.18                                     |
| 2   | S                        | n.a.                           | RFR                            | 0.72                            | -0.49                                     |
| 3   | S                        | 8 (GA)                         | Huber                          | 0.47                            | 0.14                                      |
| 4   | S                        | 8 (GA)                         | RFR                            | 0.50                            | 0.18                                      |
| 5   | X <sub>0</sub>           | n.a.                           | Huber                          | 0.74                            | -1.41                                     |
| 6   | X <sub>0</sub>           | n.a.                           | RFR                            | 0.75                            | -0.22                                     |
| 7   | X <sub>0</sub>           | 8 (GA)                         | Huber                          | 0.52                            | 0.45                                      |
| 8   | X <sub>0</sub>           | 8 (GA)                         | RFR                            | 0.90                            | 0.38                                      |
| 9   | X <sub>0</sub>           | 8 (GA)                         | MLR                            | 0.53                            | 0.38                                      |
| 10  | X <sub>0</sub>           | 8 (GA)                         | SVR                            | 0.36                            | 0.36                                      |
| 11  | X <sub>0</sub>           | 8 (SFS)                        | Huber                          | 0.36                            | 0.28                                      |
| 12  | X <sub>0</sub>           | 8 (SFS)                        | RFR                            | 0.52                            | 0.10                                      |
| 13  | X <sub>1</sub>           | 8 (GA)                         | Huber                          | 0.66                            | 0.58                                      |
| 14  | X <sub>1</sub>           | 4 (GA)                         | Huber                          | 0.60                            | 0.44                                      |
| 15  | X <sub>1</sub>           | 12 (GA)                        | Huber                          | 0.72                            | 0.64                                      |
| 16  | X <sub>1</sub>           | 8 (GA)                         | RFR                            | 0.93                            | 0.43                                      |
| 17  | X <sub>2</sub>           | 8 (GA)                         | Huber                          | 0.73                            | 0.68                                      |
| 18  | X <sub>3</sub>           | 8 (GA)                         | Huber                          | 0.74                            | 0.70                                      |

<sup>a</sup> Demonstrated for the OCM dataset of Table S1 (Nos. 1–69) using the C<sub>2</sub> yield as the target variable; <sup>b</sup> Feature set used as explanatory variables, where S: the chemical composition of catalysts and X<sub>i</sub>: the i<sup>th</sup>-order features; <sup>c</sup> Number of selected features and selection method, where n.a.: no selection, GA: genetic algorithm, and SFS: sequential feature selection; <sup>d</sup> Method of regression, where Huber: Huber regression, RFR: random forest regression, MLR: multiple linear regression, and SVR: support vector regression; <sup>e</sup> Average in 50-fold shuffle split cross-validation (90:10).

### Supplementary References

1. Nguyen, T. N. et al. Learning Catalyst Design Based on Bias-Free Data Set for Oxidative Coupling of Methane. *ACS Catal.* **11**, 1797–1809 (2021).
2. Nakanowatari, S. et al. Extraction of Catalyst Design Heuristics from Random Catalyst Dataset and their Utilization in Catalyst Development for Oxidative Coupling of Methane. *ChemCatChem* **13**, 3262–3269 (2021).
3. Takahashi, L. et al. Constructing catalyst knowledge networks from catalyst big data in oxidative coupling of methane for designing catalysts. *Chem. Sci.* **12**, 12546–12555 (2021).
4. Takahashi, K. et al. Catalysis Gene Expression Profiling: Sequencing and Designing Catalysts. *J. Phys. Chem. Lett.* **12**, 7335–7341 (2021).
5. Jayakumar, T. P. et al. Exploration of ethanol-to-butadiene catalysts by high-throughput experimentation and machine learning. *Appl. Catal. A Gen.* **666**, 119427 (2023).
6. Son, S. D. et al. High-throughput screening of multimetallic catalysts for three-way catalysis. *Sci. Technol. Adv. Mater. Methods* DOI:10.1080/27660400.2023.2284130 (2023).
